# Supplementary material for: Bubble-seq analysis of the human genome reveals distinct chromatin-mediated mechanisms for regulating early- and late-firing origins
Source: HighWire-hosted journal article supplement (doi:10.1101/gr.155218.113), 2013-07-16
Supplement: Supplemental_Material.pdf [file Supplemental_Material.pdf]

## SUPPLEMENTARY MATERIAL

***Origin distributions in open and closed chromatin, as defined by Hi-C Eigenvector (HCE) analysis.*** As an independent measure of any global relationships among origins and epigenetic attributes in GM06990, we compared origin distributions to domains defined by the Hi-C Eigenvector (HCE), which measures the physical interaction between genomic sequences and, among other things, reflects the relative degree of chromatin compaction in various regions: positive values (HCE+) are associated with open chromatin and negative values (HCE-) with closed chromatin (Lieberman-Aiden et al. 2009b). When replication timing profiles for selected murine and human cell lines were compared to a number of epigenetic features, HCE values displayed the most significant correlations by far (Ryba et al. 2010). Indeed, when we compared the global replication timing (TR50) values versus HCE values for GM06990 (both for 1 Mb windows), the correlation coefficient was also extremely high (-0.74; Table SVIIIA). Note that the negative sign results from our convention that high TR50 values correspond to late replication, which tends to occur in regions with the lowest HCE values (Table SVIIIA).

On the other hand, the correlation between origin *efficiencies* (RDs) and HCE values in the genome as a whole is poor (-0.04; Table SVIIIA6), even though there is a modest but steady downward trend in RD as replication time increases, and in HCE- compared to HCE+ (Fig. S3). The poor correlation is due to the high variability of RD levels (especially in early-replicating regions) as shown in Fig. 1B. The correlation between origin *density* and HCE values was better but modest (0.26; Table SVIIIA). Note that *density* here corresponds to the combined length of bubbles (in bp) divided by 1 Mb (i.e., the same window used to calculate HCE). The likely explanation for these observations is that origin densities are highest in early-replicating regions, drop in mid-replicating regions and increase again in late-replicating regions (Figure S4 and Table SIV). Conversely, HCE values tend to monotonically decrease from relatively large positive values in early-replicating regions to relatively large negative values in late-replicating regions (not shown). Indeed, when the HCE sign is disregarded, the correlation coefficient between origin densities and the absolute values of HCE rises to 0.5 (Table SVIIIA4). Similarly, correlation coefficients between HCE and origin density in early-, mid- and late-replicating regions are

0.58, 0.19, and -0.48, respectively (Table SVIIIA). These values are consistent with comparisons between origin and epigenetic factor densities in early- and late-replicating regions summarized in Table SVIIIB-F).

To determine the nature of origin distributions in loci that do not conform to the simplest paradigm (i.e., HCE+ regions residing in late-replicating domains and HCE- regions in early-replicating domains), we further divided early-, mid-, and late-replicating regions into HCE+ or HCE- categories. The genomic coverage of HCE+ and HCE- regions is roughly the same, occupying 1,439 and 1,443 Mb, respectively. Of the 123,412 bubble-containing fragments that unambiguously map to either of these regions, 53% reside in HCE+ regions, while 47% reside in HCE- regions (Table SIIE). Similarly, of the *initiation zones* that unambiguously map to either HCE region (25,904), 53% reside in HCE+ regions, with the mean number of fragments and the size of zones being greater (3.9 and 23.5 kb, respectively) than in HCE- regions (3.3 and 16.6 kb). Of the 47,061 *isolated* bubble-containing fragments, 55% reside in HCE- regions, with the mean size of fragments being smaller than those in HCE+ regions (5.8 kb and 6.3 kb, respectively). While we consistently find a bias toward higher densities and efficiencies of origins in open chromatin environments, nearly half of the mapped bubble-containing fragments are located in regions defined by a more closed chromatin conformation, as defined by negative HCE.

Interestingly, the characteristic edge-to-edge distances between origins (either isolated or zonal) are lowest for early-replicating HCE+ and late-replicating HCE- regions, with average values of 56 kb and 36.3 kb, respectively (not shown). Origin-containing loci are spaced much further apart in early HCE- and late HCE+ regions, with average values of 303.1 kb and 133 kb, respectively. Surprisingly, the characteristic inter-origin distances in late-replicating heterochromatic regions are comparable to those of early-replicating euchromatic regions. However, as shown in Fig. S3, origin efficiencies are lower in late-replicating HCE- regions relative to early-replicating HCE+ regions.

We also compared overlaps between origins and DNase I HSS, H3K36me3, H3K27me3, H3K4me3, and CTCF marks both in HCE+ and HCE- regions, as well as with the six HCE+ and HCE- subdivisions of early-, mid-, and late-replicating domains (Table SVII). In general, the results are

consistent with these same comparisons for the early-, mid-, and late-replicating regions as a whole (Table SVIID-F).

***Large zones and high levels of H3K36me3 are detected in a late-replicating section of chromosome X.*** Fig. S6 displays a moderately late-replicating section of the X chromosome in which the overlaps among initiation zones, transcriptional activity, and H3K36me3 modifications are extremely high. Interestingly, the largest zones in late-replicating regions, which correspond to outliers in the rightmost boxplot in Fig. 3D, are located on the X chromosome. Given that the GM06990 cell line was isolated from a female, this is most likely due to X chromosome inactivation, wherein the transcriptionally-silent X is replicated late in S-phase, driving a moderately high TR50 value, while active genes on the other X chromosome are decorated with activating marks such as H3K36me3. Indeed, the variance of the replication timing is relatively high in this region (Fig. S6).

## SUPPLEMENTARY ANALYTICAL METHODS

***The one-fragment rule for defining zones.*** Replication initiation sites in mammalian cells often cluster into zones. We define a zone as two or more adjacent bubble-containing fragments. However, many obvious zones display single-fragment gaps (as in Fig. 1). These could represent *bona fide* gaps (as in the DHFR initiation zone (Dijkwel et al. 2002)), particularly if the fragments are small. Alternatively, they could result from lack of saturation either in the biological or sequencing samples. To assess the latter possibility, we plotted a distribution of the number of negative fragments in the genome that lie between any two bubble-containing fragments, and developed a simple null model, which assumed that the probability of an EcoRI fragment containing a bubble or not containing a bubble is independent of the bubble-containing status of its neighbors. We first estimated the probability  $p$  of a genomic EcoRI fragment containing a bubble to be the fraction of EcoRI fragments containing bubbles (0.1599365 excluding chr Y). Using these assumptions, the probability of finding *two* bubble-containing fragments separated by  $n$  non-bubble-containing fragments is given by  $p^2 * (1 - p)^n$ . The null model,  $p^2 * (1 - p)^n$ , was scaled and then overlaid on the distribution of the actual data (Fig. SI). This resulted in striking agreement between the empirical data and the null model for  $n > 1$ . However, when the number of non-

bubble containing EcoRI fragments between two bubbles was one, there was a ~3.6-fold enrichment of actual data over the null model (Fig. S2). This finding suggested either that: 1) many zones are interrupted by regions that don't initiate or do so at a much reduced frequency; or 2) single fragment interruptions result from lack of complete saturation in the isolation or sequencing of bubble-containing fragments. Since both effects are possible, a one-fragment rule therefore was adopted to define a *zone* as a cluster of adjacent bubble-containing EcoRI fragments, no two of which are separated by more than one negative fragment.

*Estimation of TR50 and variance about the TR50 from GM06990 replication timing data.*

*FASTQ* files for timing data (Hansen et al. 2010) corresponding to the six replication timing windows for GM06990 (G1b, S1, S2, S3, S4 and G2) were uniquely mapped to the NCBI human genome assembly v36 (hg18), using BWA version 0.5.7. Sequence reads that mapped to chrY were removed. Individual enriched-read wig files were created and normalized for each timing sector to 4 M mapped reads by multiplying by a scale factor, similar to the approach taken by Hansen et al. (Hansen et al. 2010). This factor was calculated by dividing 4 M by the number of mapped reads for each individual timing sector. The *TR50* for a given genomic region was defined as the time at which 50% of the DNA in that region was replicated. It was assumed that 100% of the DNA in a region was replicated by the end of G2 phase. Cumulative reads within each EcoRI fragment for which there was timing data were first calculated using the normalized enriched-read profile data as follows: G1b ( $C_0 = R_0$ ), S1 ( $C_1 = R_0 + R_1$ ), S2 ( $C_2 = R_0 + R_1 + R_2$ ), S3 ( $C_3 = R_0 + R_1 + R_2 + R_3$ ), S4 ( $C_4 = R_0 + R_1 + R_2 + R_3 + R_4$ ) and G2 ( $C_5 = R_0 + R_1 + R_2 + R_3 + R_4 + R_5$ ), where  $R_0, R_1, R_2, R_3, R_4$ , and  $R_5$  are the number of reads in normalized G1b, S1, S2, S3, S4 and G2 read enrichment profile data, respectively. Replication times were indexed as follows: 0-1, 1-2, 2-3, 3-4 4-5, and 5-6 for G1b, S1, S2, S3, S4, and G2 intervals, respectively. We then determined the interval during which 50% of the DNA in that sector was replicated (i.e., the *TR50*) by linear interpolation. Regions with *TR50* values in the first two intervals were classified as early-replicating, those in the second two intervals as mid-replicating, and those in the last two intervals as late-replicating.

For comparison with HCE data for GM06990 (Lieberman-Aiden et al. 2009a), TR50 values were determined in non-overlapping 1Mb windows across the genome, using the same procedure. TR50 values were also determined across the genome in 50 kb windows in sliding steps of 1 kb. These smoothed TR50 curves are assumed to predict the overall trend of replication.

*Variance about the TR50* in a region measures the spread of replication-timing data relative to TR50 over that region. For a region with timing data, the variance about TR50 was defined as:

$$Variance = \left( \frac{\sum_{i=0}^5 ((i - TR50)^2 * R_i)}{\sum_{i=0}^5 R_i} \right), \quad \sum_{i=0}^5 R_i \neq 0, \quad (1)$$

where  $i$  is the replication time index from 0 to 5,  $TR50$  was calculated as specified earlier, and  $R_i$  is the normalized number of reads for replication time index  $i$  in a given region. Variances about the TR50s were determined for individual EcoRI fragments, non-overlapping 1Mb windows over the genome; as well as for 50 kb windows over the genome, in sliding steps of 1 kb.

*Constructing a matching transcriptome for the GM06990 cell line.* Sequence reads for the two cDNA libraries for the GM06990 cell line propagated in our laboratory were merged. TopHat version 1.0.13 (Trapnell and Salzberg 2009) and Bowtie version 0.12.5.0 (Langmead et al. 2009) were used to uniquely align RNA-Seq reads to NCBI human genome assembly v36 (hg18). The parameters used were *min-intron-length* 30, and a reference transcript annotation file (wgEncodeGencodeManualV3.gtf; transcript annotation of the human genome NCBI36). The RNA-Seq read alignments were converted to SAM format with TopHat (Trapnell and Salzberg 2009). Cufflinks version 0.8.3 (Trapnell et al. 2010) was then used to assemble transcripts from the aligned reads in SAM format, and to estimate their relative abundances based on the same reference transcript annotation file. Abundances were reported in *FPKM* (fragments per kilobase of exon model per million mapped fragments). Out of a possible 37,576 genes/isoforms, 21,322 putative isoforms were identified and their FPKM values were reported along with their confidence limits. The distribution of background FPKM values for the 21,322 putative isoforms displayed a very good fit to an exponential null model:

$$P(x) = c * \lambda^x, \quad (2)$$

in which  $c$  and  $\lambda$  are constants and  $x$  is FPKM. Best fits were observed with the parameters  $c = 135.9110$  and  $\lambda = 0.1352$ . In total, 10,393 genes were found to have significant FPKM values after p-values were adjusted to FDR values, and an FDR cutoff of 5% was applied. The 5' UTRs, 3' UTRs, and exons corresponding to these 10,393 significant transcripts were identified from the Cufflinks output. In order to filter out genes that contained a small fraction of 5' UTR, 3' UTR, and exons with high FPKM values, which could represent spurious pile-ups of the mapped reads, we calculated the fractional coverage of expressed exons and the 5' and 3' UTRs of known genes. The plot of the distribution of the fraction of the gene that is expressed (excluding introns) displayed a bimodal distribution characteristic of expressed and non-expressed genes, with a dip near 0.5. Thus, we classified a gene as transcribed if  $\geq 60\%$  of its sequence (excluding introns) was expressed (i.e., exceeded the 5% FDR FPKM-based cutoff).

#### SUPPLEMENTAL FIGURE AND TABLE LEGENDS

***Figure S1. Raw replication timing data for segments of the GM06990 genome demonstrating different TR50s and variances about the TR50s.*** IGV screen shots of raw replication timing data compiled by Hansen and coworkers and collected from six S-phase fractions sorted based on DNA content (Hansen et al. 2010). Four different ~1 Mb genomic windows are shown that display different relationships among raw replication timing data, TR50s, and variances about the TR50s. Panel A. An early-replicating region (i.e., low TR50) with low variance. Panel B. a late-replicating region (high TR50) displaying low variance. Panel C. A generally early-replicating region (moderately low TR50) displaying high variance. Panel D. A generally late-replicating region (moderately high TR50) displaying high variance.

***Figure S2. The RDs for technical and biological replicates are better correlated for origins firing in early S-phase than for those firing in mid- or late S-phase.*** Scatter plots of RDs for bubble-containing fragments in early (A-C), mid- (D-F), and late-replicating (G-I) genomic regions between pairs of technical replicates for the B1 bubble library (B1A and B1B; Panels A, D, and G), between the B1A

and B2 bubble libraries (Panels B, E, and H), and between B1B and B2 (Panels C, F, and I). The indicated  $R^2$  values are the corresponding Pearson correlation coefficients. RDs were included in the plot and in the calculation of  $R^2$  if they passed the 0.1% FDR cutoff in at least one of the two replicates being compared.

**Figure S3. Origin efficiencies and transcription levels both are lower in late-replicating DNA and in DNA with decreased chromatin accessibility.** RDs of bubble-containing fragments (panel A) and RNA transcript levels (panel B; our cDNA sequencing data) for early-, mid-, and late-replicating regions. These were further subdivided into HiC eigenvector (HCE) positive and negative loci. Positive and negative HCE values correspond to open and closed chromatin regions, respectively. The decreasing trend in both origin efficiency and RNA level appears to be driven more by replication timing than HCE sign, suggesting that timing may be a slightly better measure of chromatin accessibility. Note that the horizontal black line in each box corresponds to the *median* of values, whereas the data in Table SIIE&F report the *means* (averages).

**Figure S4. Origin end-to-end distances in late-replicating regions tend to be smaller than those in early-replicating regions.** Distributions of end-to-end distances between origins in early (A-C) and late (D-F) replicating regions, calculated for all origins (A and D), isolated origins only (B and E), and zones only (C and F). Numbers in the upper right hand are the mean/median distances. Zones were treated as units in these calculations (i.e., end-to-end distances were measured between the centers of either the isolated or the outermost fragments of zones). Origins are generally less efficient and initiation zones are smaller in late-replicating regions, but inter-origin distances tend to be smaller.

**Figure S5. The densities of H3K36me3, H4K4me3, and CTCF sites increase with increasing number of fragments in zones.** Boxplots of epigenetic factor broadpeak site densities per bubble-containing fragment, averaged over the fragments in a zone as a function of the number of fragments in that zone. Note that *density* here corresponds to the combined length of bubbles (in bp) within each EcoRI fragment divided by its length (in bp). Panel A. H3K36me3. Panel B. H3K4me3. Panel C. CTCF broadpeak sites.

**Figure S6. *X*-inactivation likely rationalizes high origin activity, large initiation zones, high transcription levels, and the H3K36me3 histone modification in a moderately late-replicating region.**

IGV screen shot of a 729 kb region on chrX, showing: RDs for bubble-containing fragments, initiation zone calls, smoothed TR50s calculated for 50 kb sliding windows in steps of 1 kb, smoothed TR50 variances calculated for 50 kb sliding windows in steps of 1 kb, HCE values calculated for non-overlapping 1 Mb windows, H3K36me3 read profiles at narrowpeak sites, H3K36me3 narrowpeak site densities in 1 Mb windows, H3K36me3 read profile at broadpeak sites, H3K36me3 broadpeak site densities in 1 Mb windows, cDNA overlapping read profiles, and RefSeq gene annotations. High transcriptional and H3K36me3 levels likely arise from the *active* X which is likely early-replicating, while the relatively late-replicating phenotype (based on TR50) is likely driven by the *inactive* X chromosome. Thus, the variance in replication timing about TR50 is relatively high at this locus.

#### TABLE LEGENDS

**Table SI. RDs of bubble-containing *EcoRI* fragments in the integrated EBV genome.** All of the *EcoRI* fragments in the *circular* EBV genome are listed, along with their RDs in the three sequencing datasets. The 5' end of a 4,167 bp fragment is arbitrarily designated position one, but the viral genome was linearized at some unknown position by integration into the GM06990 genome. The leftmost (49,622 bp) *EcoRI* fragment on the portion of the EBV map contains the viral lytic origin (*oriP*), including the DS and FR elements, near its left end. *B1A* and *B1B*: RDs for sequencing replicates. *B1* and *B2*: RDs for biological replicates. *GM*: combined RDs. Note that RD cutoffs were established independently for each of the three replicates as well as for the combined RDs, as indicated in the last row.

**Table SII. Size and signal strength of bubble-containing *EcoRI* fragments.** Panel A. Distribution of bubble-containing fragments within the isolated and zonal fragment categories, and numbers of zonal fragments with and without the inclusion of single negative fragments. Panel B. Distribution of bubble-containing fragments among the three replication timing domains. Panel C. Size distributions of: origins (whether isolated or zonal); zonal fragments with or without the inclusion of



single negative fragments; and as a function of their replication timing windows shown for all fragments, whether isolated or zonal, and for all origins whether isolated or zonal. Panel D. Numbers of origins, whether isolated or zonal, and the numbers of zonal fragments distributed among the three timing windows. Panel E. Number and average signal strength (RDs) of bubble-containing fragments in HCE+ and HCE- domains in the whole genome, or as a function of origin firing times. Panel F. Numbers and average signal strengths of 5' UTRs, 3' UTRs and exons that overlap HCE+ and HCE- domains in the indicated categories of EcoRI fragments. Panel G. Numbers of isolated origins and zones that overlap HCE+ and HCE- regions. Panel H. Size distributions of isolated bubble-containing fragments and zones in HCE+ and HCE- regions.

**Table SIII. Significance of origin distributions within early-, mid-, and late-replication timing windows.** The genome was divided into early-, mid-, and late-replicating regions, with these categories representing 23.7%, 35.3%, and 32.3% of the genome, respectively. The distributions of bubble-containing fragments within each timing sector were then determined to be 31.9%, 31.9%, and 36.2%, respectively. To determine the significance of the actual bubble distributions in each timing sector, all genomic EcoRI fragments (bubbles and non-bubbles) were randomly permuted 10,000 times within non-overlapping 1 Mb windows across the genome, as described in Methods. The low p-value and high z-score for the early-firing bubble distribution suggest a large and *bona fide* increase in bubble density in this compartment. Also note the ~20% lower number of bubbles in mid-S-phase regions relative to mean random, suggesting a relative depletion in initiations in these timing transition regions (Desprat et al 2009).

**Table SIV. Statistical relationships among bubble-containing fragments, transcription units, and replication time signatures (in support of Figure 4).** Distributions and genomic coverage by RefSeq genes (non-transcribed and transcribed, the latter determined from the cDNA library prepared from GM06990 for this study; see Methods). Panels A-C: Data for the entire genome, for bubble-containing fragment calls made for the combined sequencing datasets, and for bubble calls from the individual origin libraries, respectively.

**Table SV. Significance of overlaps between bubble-containing fragments and nine gene annotation categories (in support of Figure 4).** Significance analyses were performed as described in the legend to Table SIII for all bubble-containing fragments (Panel A), and for early-firing (Panel B), mid-firing (Panel C), and late-firing fragments (Panel D). The nine transcription-related categories listed in the first column of each panel correspond to each sector of the pie-chart in Fig. 4. The normalized values in the right three columns were calculated as described in the main text. The two highest fold-changes are highlighted.

**Table SVI. Significance of overlaps between bubble-containing factors and epigenetic factors.** The significance of the overlaps between bubble-containing fragments and the indicated epigenetic factor sites were performed as described in the legend to Table SIII for all bubble-containing fragments (Panel A), and for early-firing (Panel B), mid-firing (Panel C), and late-firing (Panel D) bubble-containing fragments. The normalized values in the right three columns were calculated as described in the main text.

**Table SVII. Origin-epigenetic factor overlap summaries.** Basic overlap statistics between bubble-containing fragments and six different epigenetic factor datasets and as a function of replication time and HCE status. Data are presented for the whole genome (Panels A-C), and for early-, mid-, and late-firing bubble-containing fragments (Panels D-F). The latter three categories are further broken down into HCE+ and HCE- categories in Panels G-L. Reading from left to right, the values correspond to: the number of bubble-containing fragments that overlap one or more particular sites; the number of bubbles in the selected regions (e.g., whole genome, early-replicating, or early-replicating HCE+ or early-replicating HCE-); the percentage of bubbles that overlap the factor sites; the number of epigenetic factor sites that overlap bubble-containing fragments; the number of epigenetic factor sites in the selected regions (e.g., early-replicating), and the percentage of epigenetic factor sites that overlap bubble-containing fragments.

**Table SVIII. Correlation coefficients between origin densities (isolated or zonal) and epigenetic factors calculated for 1 Mb intervals.** Summaries of correlation coefficients between origin

densities and HCE values, TR50 values, and the indicated epigenetic factor site densities calculated in 1 Mb windows. Columns, from left to right, are: Pearson correlation coefficients, p-values calculated for the Pearson correlation coefficient, Spearman correlation coefficients, and Kendall tau correlation coefficients (Becker et al. 1988).

**Table SIX. Significance of NS/Bubble overlaps and G-quadruplexes distributions.** Panel A. The numbers and percentages of NS in each human cell line that overlap GM06990 bubble-containing fragments (NS data from Besnard et al. 2012). The p-values, fold-changes over mean random, and Z-scores are shown. Significance analyses were performed as described in Methods. Panel B. The numbers and percentages of GM06990 bubble-containing fragments that overlap NS in each of the four human cell lines, along with significance values. Panel C. The numbers, percentages, and significance of G-quadruplex/bubble overlaps.

## REFERENCE LIST

- Desprat R, Thierry-Mieg D, Lailier N, Schildkraut CL, Thierry-Mieg and Bouhassira EE. Predictable dynamic program of timing of DNA replication in human cells. *Genome Res.* **19**:2288-2299.
- Diffley JF, Cocker JH, Dowell SJ, Rowley A. 1994. Two steps in the assembly of complexes at yeast replication origins in vivo. *Cell* **78**: 303-316.
- Dijkwel PA, Wang S, Hamlin JL. 2002. Initiation sites are distributed at frequent intervals in the Chinese hamster dihydrofolate reductase origin of replication but are used with very different efficiencies. *Mol. Cell Biol.* **22**: 3053-3065.
- Hansen RS, Thomas S, Sandstrom R, Canfield TK, Thurman RE, Weaver M, Dorschner MO, Gartler SM, Stamatoyannopoulos JA. 2010. Sequencing newly replicated DNA reveals widespread plasticity in human replication timing. *Proc. Natl. Acad. Sci. U. S. A* **107**: 139-144.
- Langmead B, Trapnell C, Pop M, Salzberg SL. 2009. Ultrafast and memory-efficient alignment of short DNA sequences to the human genome. *Genome Biol.* **10**: R25.

Lieberman-Aiden E, van Berkum NL, Williams L, Imakaev M, Ragoczy T, Telling A, Amit I, Lajoie BR, Sabo PJ, Dorschner MO, Sandstrom R, Bernstein B, Bender MA, Groudine M, Gnirke A, Stamatoyannopoulos J, Mirny LA, Lander ES, Dekker J. 2009a. Comprehensive mapping of long-range interactions reveals folding principles of the human genome. *Science* **326**: 289-293.

Lieberman-Aiden E, van Berkum NL, Williams L, Imakaev M, Ragoczy T, Telling A, Amit I, Lajoie BR, Sabo PJ, Dorschner MO, Sandstrom R, Bernstein B, Bender MA, Groudine M, Gnirke A, Stamatoyannopoulos J, Mirny LA, Lander ES, Dekker J. 2009b. Comprehensive mapping of long-range interactions reveals folding principles of the human genome. *Science* **326**: 289-293.

Ryba T, Hiratani I, Lu J, Itoh M, Kulik M, Zhang J, Schulz TC, Robins AJ, Dalton S, Gilbert DM. 2010. Evolutionarily conserved replication timing profiles predict long-range chromatin interactions and distinguish closely related cell types. *Genome Res.* **20**: 761-770.

Trapnell C and Salzberg SL. 2009. How to map billions of short reads onto genomes. *Nat. Biotechnol.* **27**: 455-457.

Trapnell C, Williams BA, Pertea G, Mortazavi A, Kwan G, van Baren MJ, Salzberg SL, Wold BJ, Pachter L. 2010. Transcript assembly and quantification by RNA-Seq reveals unannotated transcripts and isoform switching during cell differentiation. *Nat. Biotechnol.* **28**: 511-515.

Figure S1

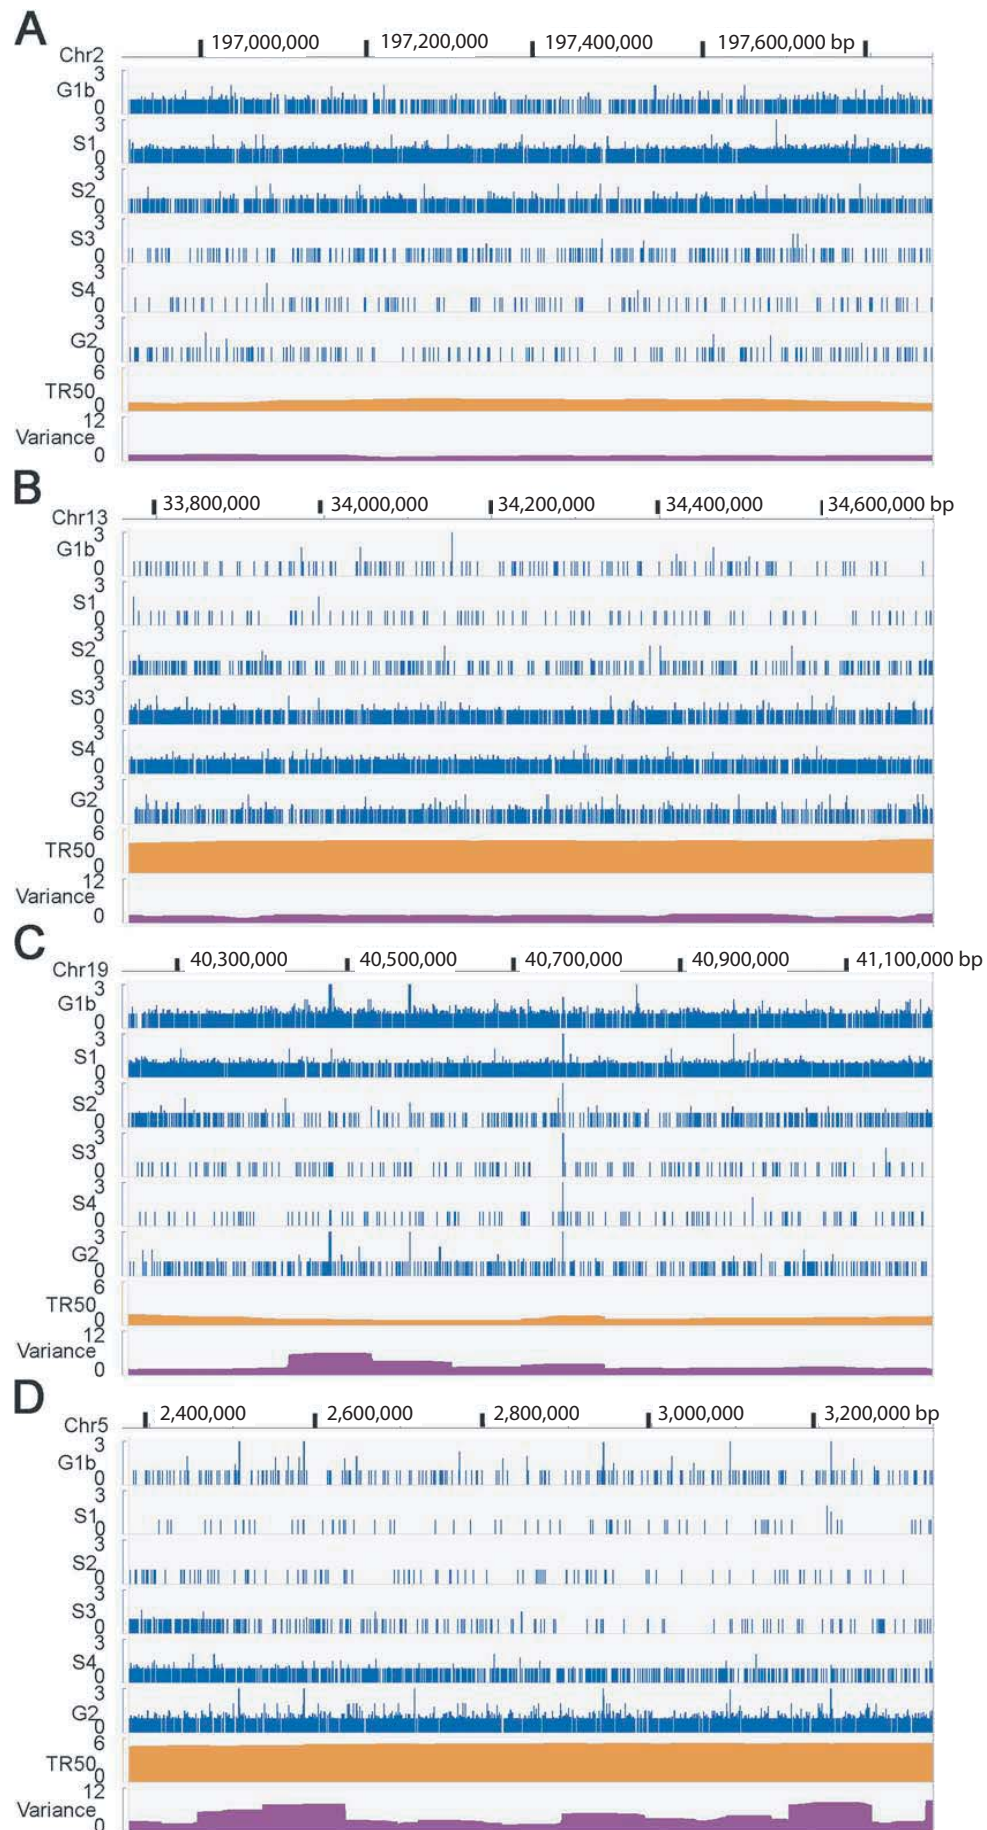

Figure S2

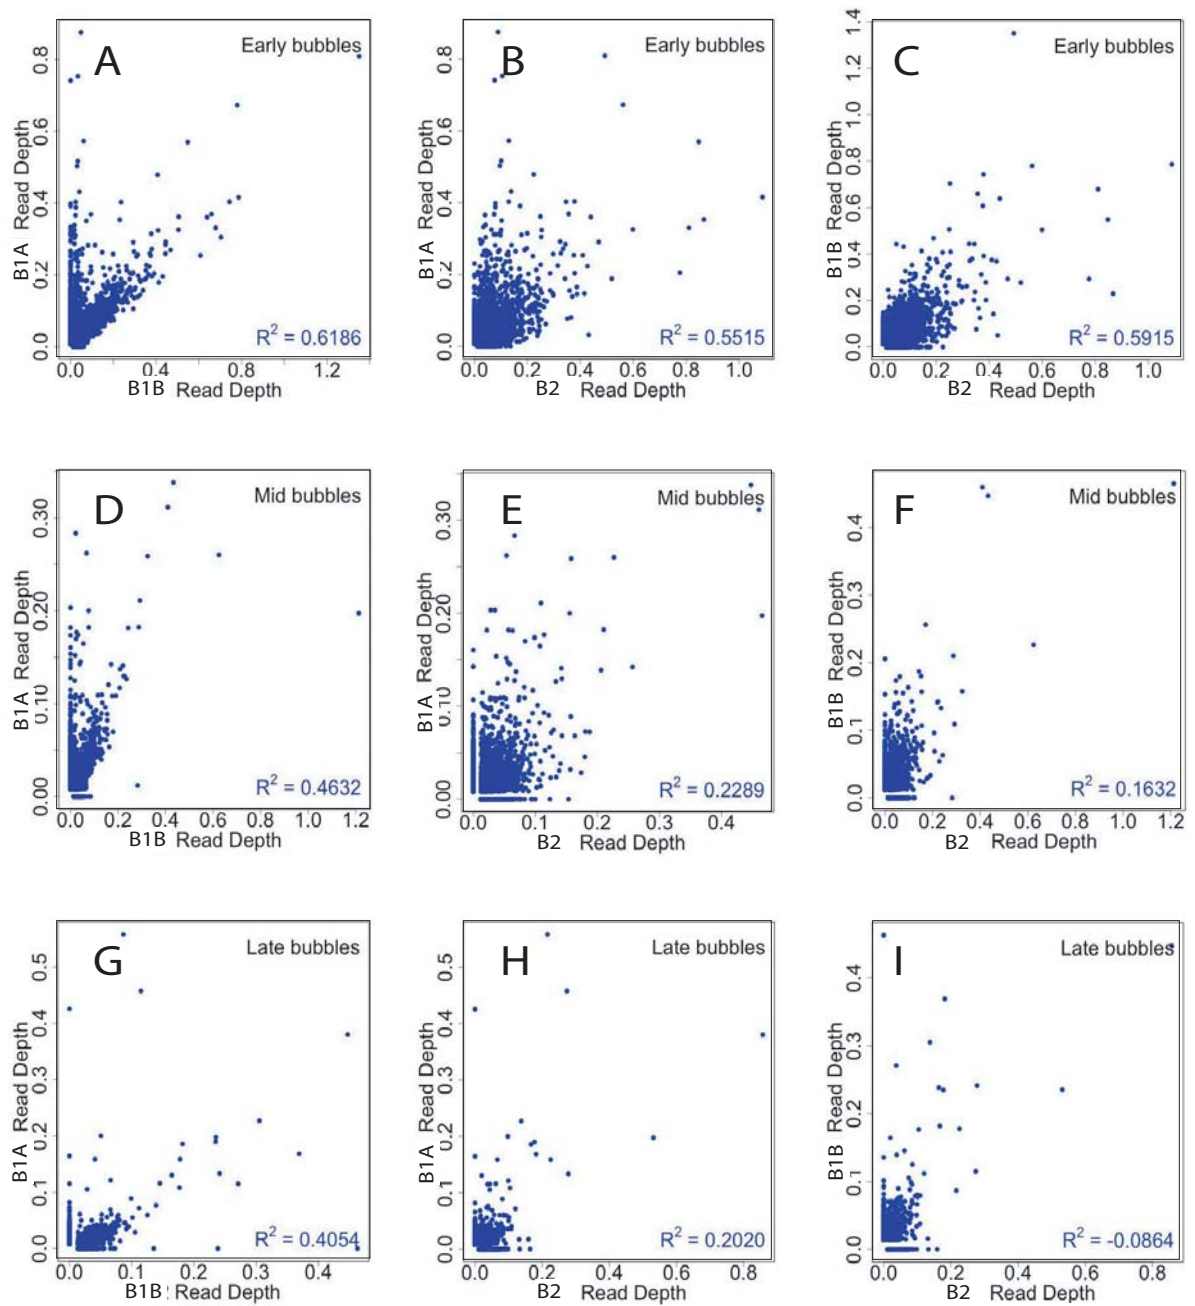

Figure S3

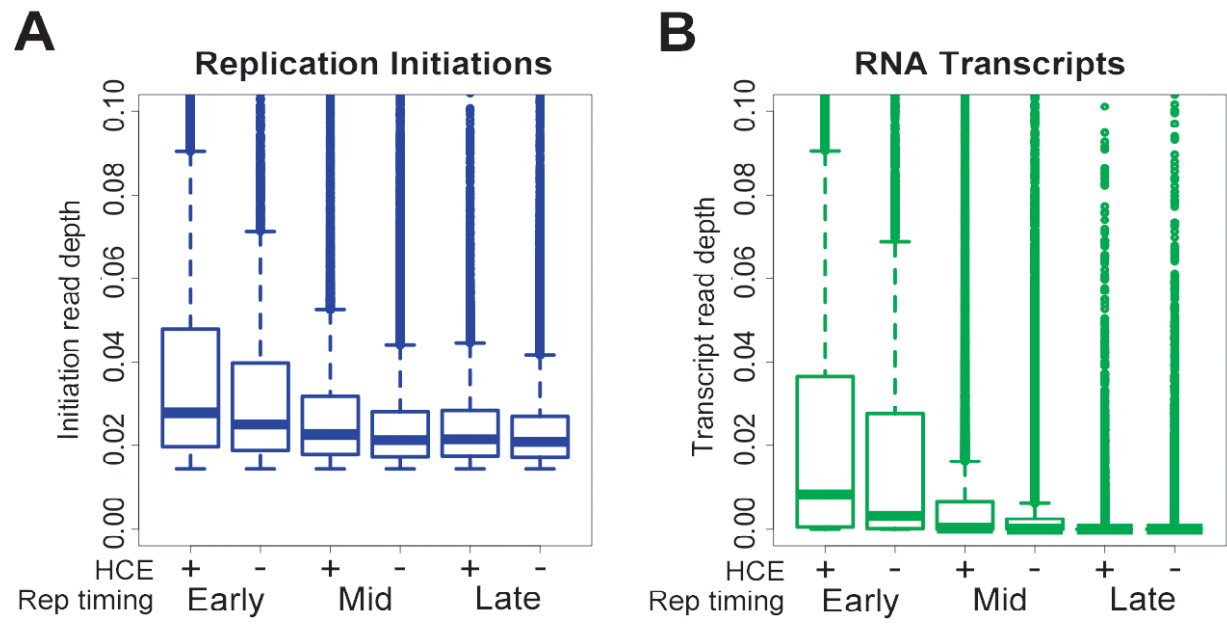

Figure S4

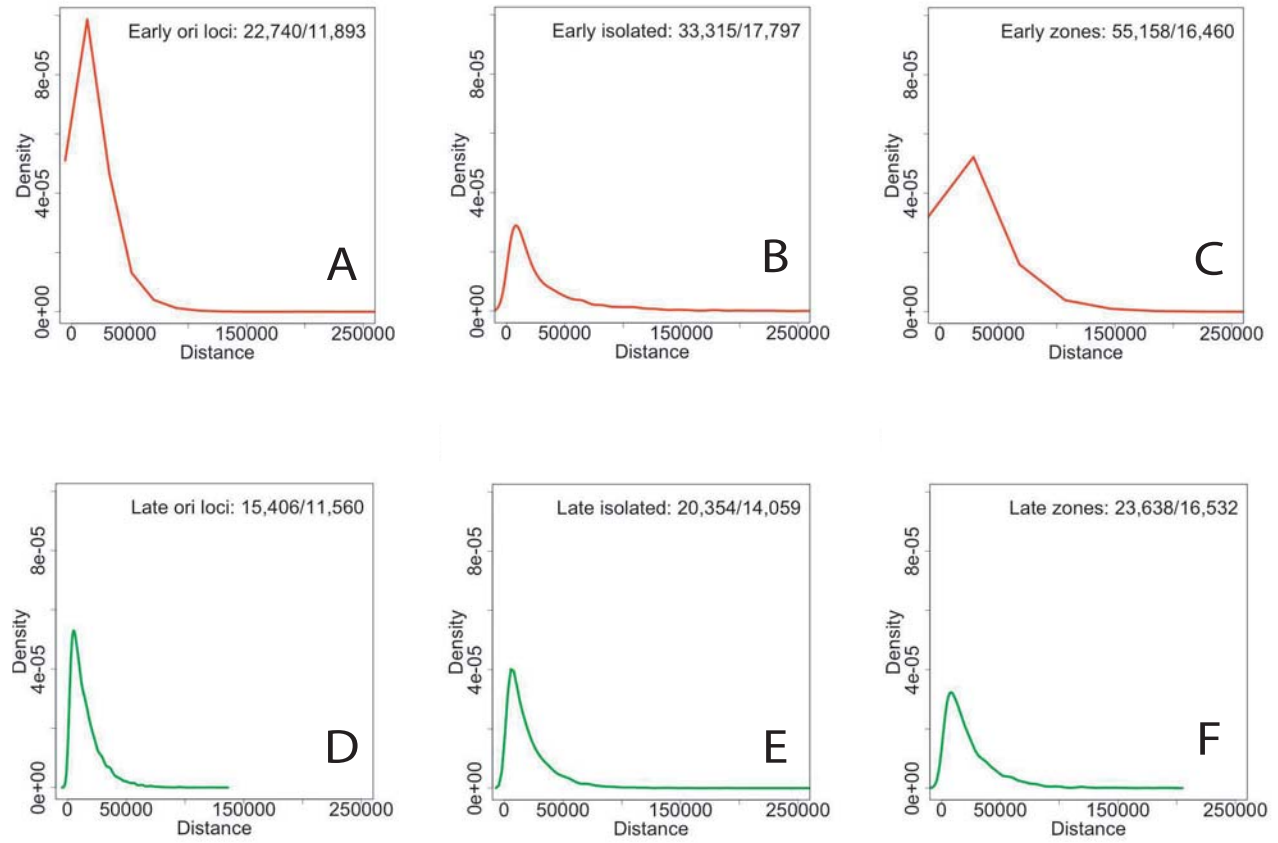



Figure S5

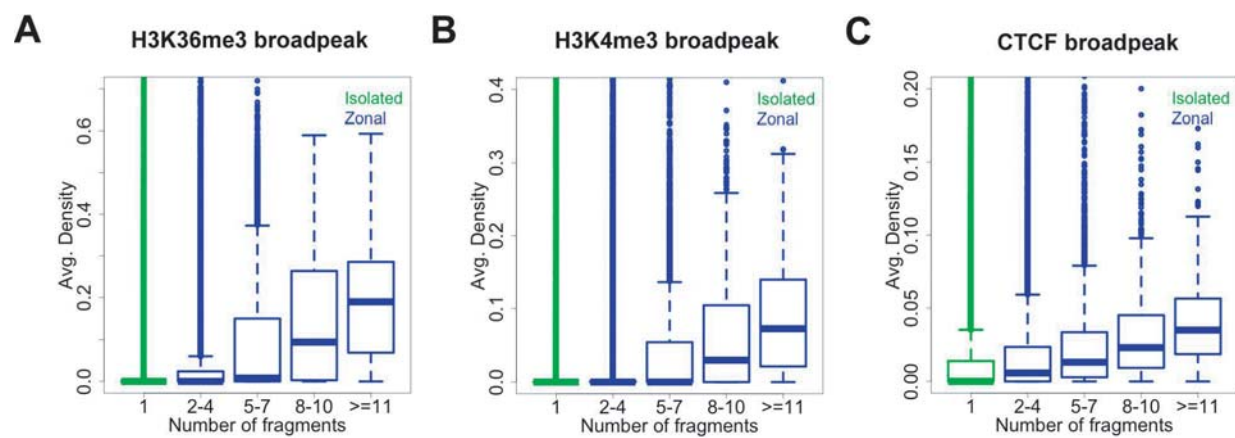

Figure S6

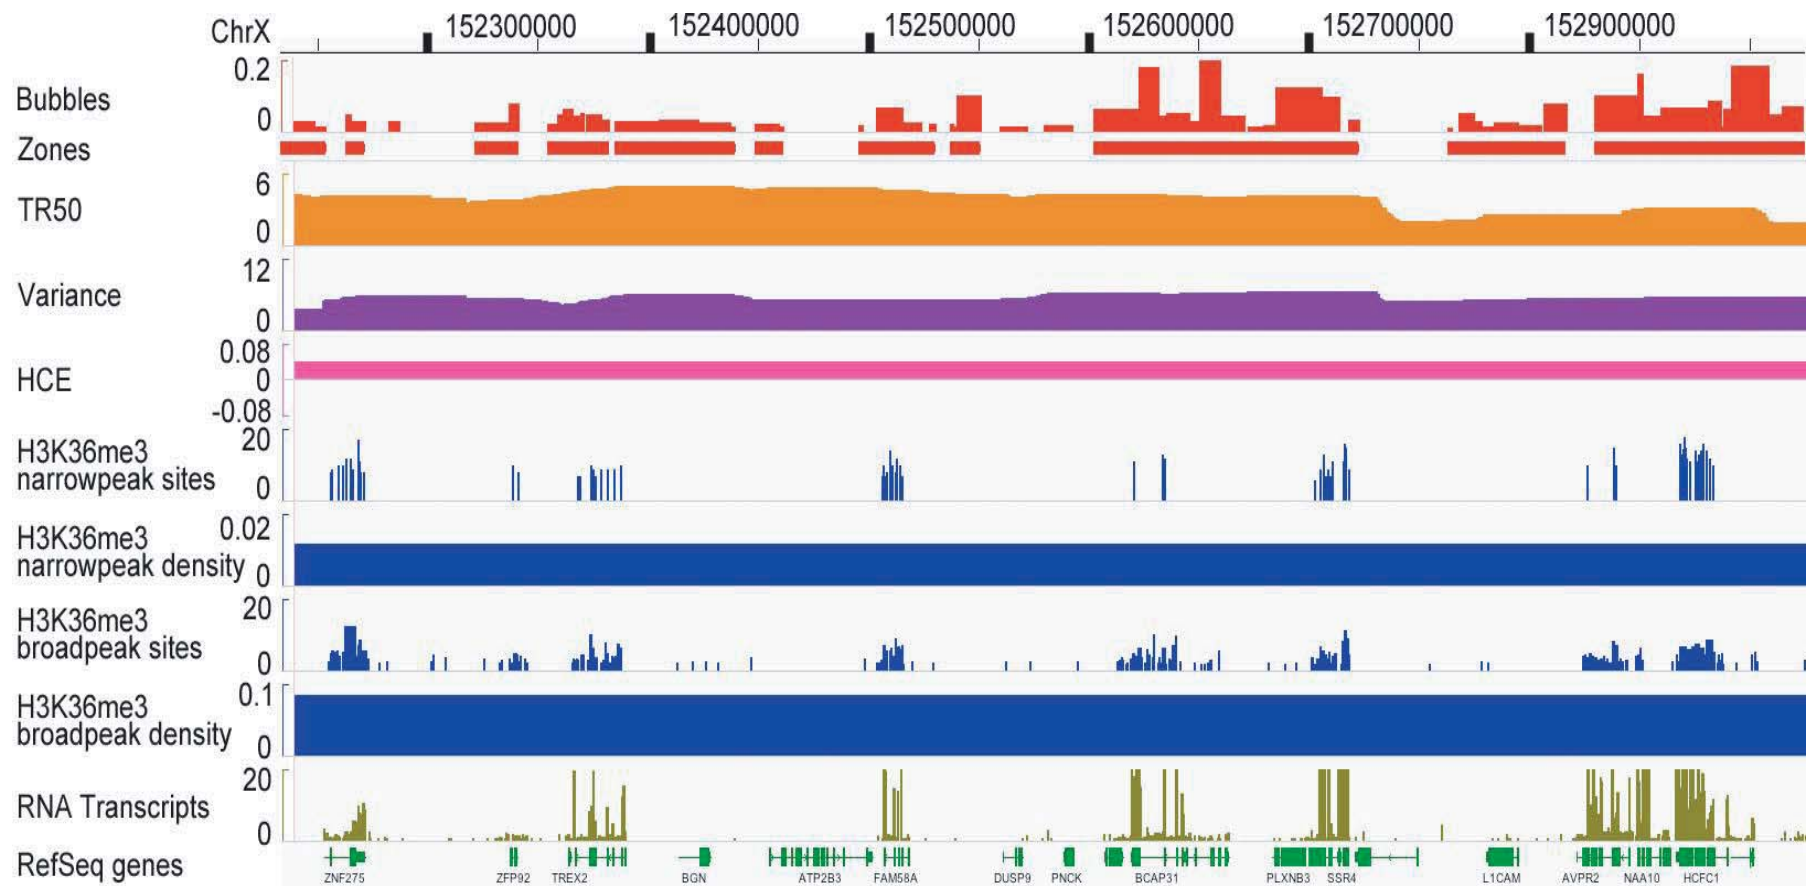

**Table SI – Bubble-containing EcoRI fragments in the integrated EBV genome**

| EBV fragment sizes in base pairs |        |       | B1A Read Depth | B1B Read Depth | B2 Read Depth | Combined Read Depth |
|----------------------------------|--------|-------|----------------|----------------|---------------|---------------------|
| 5'-end                           | 3'-end | Size  |                |                |               |                     |
| 1                                | 4167   | 4167  | 1.0114         | 1.6955         | 0.8609        | 3.8228              |
| 4168                             | 7320   | 3153  | 0.4138         | 0.3382         | 0.0859        | 0.8169              |
| 7325                             | 56947  | 49623 | 0.0181         | 0.0211         | 0.0197        | 0.0576              |
| 56952                            | 63183  | 6232  | 1.3674         | 1.4237         | 0.6551        | 3.4403              |
| 63188                            | 64442  | 1255  | 0.2248         | 0.3023         | 0.0282        | 0.5739              |
| 64447                            | 70766  | 6320  | 0.8332         | 1.3339         | 1.6357        | 3.8536              |
| 70771                            | 79204  | 8434  | 3.0855         | 4.2626         | 2.4135        | 9.6673              |
| 79209                            | 79838  | 630   | 0.2819         | 0.6344         | 0.1147        | 0.8761              |
| 79843                            | 80939  | 1097  | 0.0693         | 0.1058         | 0.0265        | 0.1106              |
| 80944                            | 82961  | 2018  | 0.1839         | 0.2819         | 1.1633        | 0.4510              |
| 82966                            | 113858 | 30893 | 0.1597         | 0.0762         | 0.1671        | 0.3838              |
| 113863                           | 125760 | 11898 | 1.3287         | 1.6525         | 2.4147        | 5.3575              |
| 125765                           | 131225 | 5461  | 1.1530         | 1.7489         | 0.9004        | 3.9296              |
| 131230                           | 160879 | 29650 | 3.1135         | 3.8814         | 2.1473        | 9.1970              |
| 160880                           | 172764 | 11885 | 2.1003         | 1.8219         | 1.2762        | 5.1623              |
| Read Depth Cutoffs               |        |       | 0.0081         | 0.0139         | 0.0123        | 0.0144              |

**Table SII – Size and signal strength of bubble-containing EcoRI fragments**

| <b>A. Statistics based on the one-fragment joining rule</b>                | Frag # | Percent |
|----------------------------------------------------------------------------|--------|---------|
| Total number of bubble-containing fragments (excluding negative RIs)       | 123297 | 100.0%  |
| Number of <i>isolated</i> bubble-containing fragments                      | 47005  | 38.1%   |
| Number of <i>zonal</i> fragments (excluding negative EcoRIs)               | 76292  | 61.9%   |
| Number of <i>zones</i> (excluding negative fragments)                      | 25835  |         |
| Mean number of EcoRIs in <i>zones</i> (excluding negative EcoRIs)          | 2.95   |         |
| Total number of <i>origins</i> if <i>zones</i> are treated as <i>units</i> | 72840  |         |
|                                                                            |        |         |
| Total number of bubble-containing fragments (including negative RIs)       | 140685 | 100.0%  |
| Number of <i>isolated</i> bubble-containing fragments                      | 47005  | 33.4%   |
| Number of <i>zonal</i> fragments (including negative EcoRIs)               | 93680  | 66.6%   |
| Number of <i>zones</i> (including negative fragments)                      | 25807  |         |
| Mean number of EcoRIs in <i>zones</i> (including negative EcoRIs)          | 3.63   |         |
| Total number of <i>origins</i> if <i>zones</i> are treated as <i>units</i> | 72812  |         |

| <b>B. Classifications based on timing data</b>                       | Frag # | Percent |
|----------------------------------------------------------------------|--------|---------|
| Total number of bubble-containing fragments (excluding negative RIs) | 123297 | 100.0%  |
| Number of early-firing bubble-containing fragments                   | 39236  | 31.8%   |
| Number of mid-firing bubble-containing fragments                     | 39313  | 31.9%   |
| Number of late-firing bubble-containing fragments                    | 44527  | 36.1%   |
| Number of bubble-containing fragments with no timing data            | 221    | 0.2%    |

| <b>C. Origin size distributions</b>             | Mean (bp) | Median(bp) |
|-------------------------------------------------|-----------|------------|
| Isolated bubble-containing fragments            | 6031      | 5643       |
| Zones                                           | 20235     | 15755      |
| Zonal fragments (excluding negative EcoRIs)     | 6113      | 5448       |
| Zonal fragments (including negative EcoRIs)     | 5580      | 4840       |
|                                                 |           |            |
| Early-firing bubble-containing fragments        | 6773      | 5888       |
| Mid-firing bubble-containing fragments          | 5952      | 5488       |
| Late-firing bubble-containing fragments         | 5615      | 5345       |
| Bubble-containing fragments with no timing data | 872       | 733        |
|                                                 |           |            |
| Early-firing isolated fragments                 | 6675      | 6037       |
| Early-firing zones                              | 27054     | 19871      |
| Mid-firing isolated fragments                   | 5971      | 5617       |
| Mid-firing zones                                | 18076     | 14988      |
| Late-firing isolated fragments                  | 5791      | 5535       |
| Late-firing zones                               | 16028     | 14061      |

| D. Statistics associated with timing data                                        | Frag # | Percent |
|----------------------------------------------------------------------------------|--------|---------|
| Number of early-firing EcoRI fragments (excluding negative EcoRIs)               | 39236  | 100.0%  |
| Number of early-firing <i>isolated</i> bubble-containing fragments               | 9686   | 24.7%   |
| Number of early-firing <i>zonal</i> fragments (excluding negative EcoRIs)        | 29550  | 75.3%   |
| Number of early-firing <i>zones</i> treated as units (excluding negative EcoRIs) | 8321   | 46.2%   |
| Mean number of EcoRIs in early-firing <i>zones</i> (excluding negative EcoRIs)   | 3.55   |         |
| Total number of early-firing <i>origins</i> if <i>zones</i> are treated as units | 18007  | 100.0%  |
|                                                                                  |        |         |
| Total number of early-firing EcoRI fragments (including negative EcoRIs)         | 45514  | 100.0%  |
| Number of early-firing <i>isolated</i> bubble-containing fragments               | 9686   | 21.3%   |
| Number of early-firing <i>zonal</i> fragments (including negative EcoRIs)        | 35828  | 78.7%   |
| Number of early-firing <i>zones</i> treated as units (including negative EcoRIs) | 8313   | 46.2%   |
| Mean number of EcoRIs in early-firing <i>zones</i> (including negative EcoRIs)   | 4.31   |         |
| Total number of early-firing <i>origins</i> if <i>zones</i> are treated as units | 17999  | 100.0%  |
|                                                                                  |        |         |
| Total number of mid-firing EcoRI fragments (excluding negative EcoRIs)           | 39313  | 100.0%  |
| Number of mid-firing <i>isolated</i> bubble-containing fragments                 | 17448  | 44.4%   |
| Number of mid-firing <i>zonal</i> fragments (excluding negative EcoRIs)          | 21865  | 55.6%   |
| Number of mid-firing <i>zones</i> treated as units                               | 8279   | 32.2%   |
| Mean number of EcoRIs in mid-firing <i>zones</i> (excluding negative EcoRIs)     | 2.64   |         |
| Total number of mid-firing <i>origins</i> if <i>zones</i> are treated as units   | 25727  | 100.0%  |
|                                                                                  |        |         |
| Total number of mid-firing EcoRI fragments (including negative EcoRIs)           | 45209  | 100.0%  |
| Number of mid-firing <i>isolated</i> bubble-containing fragments                 | 17448  | 38.6%   |
| Number of mid-firing <i>zonal</i> fragments (including negative EcoRIs)          | 27761  | 61.4%   |
| Number of mid-firing <i>zones</i> treated as units                               | 8287   | 32.2%   |
| Mean number of EcoRIs in mid-firing <i>zones</i> (including negative EcoRIs)     | 3.35   |         |
| Total number of mid-firing <i>origins</i> if <i>zones</i> are treated as units   | 25735  | 100.0%  |
|                                                                                  |        |         |
| Total number of late-firing EcoRI fragments (excluding negative EcoRIs)          | 44527  | 100%    |
| Number of late-firing <i>isolated</i> bubble-containing fragments                | 19792  | 44.5/%  |
| Number of late-firing <i>zonal</i> fragments (excluding negative EcoRIs)         | 24735  | 55.5%   |
| Number of late-firing <i>zones</i> treated as units (excluding negative EcoRIs)  | 9233   | 31.8%   |
| Mean number of EcoRIs in late-firing <i>zone</i> (excluding negative EcoRIs)     | 2.68   |         |
| Total number of late-firing <i>origins</i> if <i>zones</i> are treated as units  | 29025  | 100.0%  |
|                                                                                  |        |         |
| Total number of late-firing EcoRI fragments (including negative EcoRIs)          | 49876  | 100.0%  |
| Number of late-firing <i>isolated</i> bubble-containing fragments                | 19792  | 39.7/%  |
| Number of late-firing <i>zonal</i> fragments (including negative EcoRIs)         | 30084  | 60.3%   |
| Number of late-firing <i>zones</i> treated as units (including negative EcoRIs)  | 9228   | 31.8%   |
| Mean number of EcoRIs in late-firing <i>zones</i> (including negative EcoRIs)    | 3.26   |         |
| Total number of late-firing <i>origins</i> if <i>zones</i> are treated as units  | 29020  | 100.0%  |

| <b>E. Signal strengths of bubble-containing fragments</b>        | Number | Avg. RD |
|------------------------------------------------------------------|--------|---------|
| All bubble-containing fragments overlapping HCE+                 | 65009  | 0.0387  |
| All bubble-containing fragments overlapping HCE-                 | 58403  | 0.0259  |
| Bubble-containing fragments overlapping HCE+ & HCE-              | 116    | 0.0379  |
| Early-firing bubble-containing fragments overlapping HCE+        | 34752  | 0.0471  |
| Early-firing bubble-containing fragments overlapping HCE-        | 4529   | 0.0372  |
| Early-firing bubble-containing fragments overlapping HCE+ & HCE- | 45     | 0.0534  |
| Mid-firing bubble-containing fragments overlapping HCE+          | 23955  | 0.0300  |
| Mid-firing bubble-containing fragments overlapping HCE-          | 15410  | 0.0264  |
| Mid-firing bubble-containing fragments overlapping HCE+ & HCE-   | 52     | 0.0293  |
| Late-firing bubble-containing fragments overlapping HCE+         | 6263   | 0.0243  |
| Late-firing bubble-containing fragments overlapping HCE-         | 38283  | 0.0258  |
| Late-firing bubble-containing fragments overlapping HCE+ & HCE-  | 19     | 0.0248  |

| <b>F. Signal strengths of transcripts overlapping bubbles in HCE+/-</b>  | Number | RNA RD |
|--------------------------------------------------------------------------|--------|--------|
| Transcripts overlapping non-bubble-containing fragments in HCE+          | 298333 | 0.0126 |
| Transcripts overlapping non-bubble-containing fragments in HCE-          | 349691 | 0.0035 |
| Transcripts overlapping bubble-containing fragments in HCE+              | 65009  | 0.0318 |
| Transcripts overlapping bubble-containing fragments in HCE-              | 58403  | 0.0137 |
| Transcripts overlapping early-firing bubble-containing fragments in HCE+ | 34752  | 0.0470 |
| Transcripts overlapping early-firing bubble-containing fragments in HCE- | 4529   | 0.0319 |
| Transcripts overlapping mid-firing bubble-containing fragments in HCE+   | 23955  | 0.0173 |
| Transcripts overlapping mid-firing bubble-containing fragments in HCE-   | 15410  | 0.0335 |
| Transcripts overlapping late-firing bubble-containing fragments in HCE+  | 6263   | 0.0036 |
| Transcripts overlapping late-firing bubble-containing fragments in HCE-  | 38283  | 0.0035 |

| <b>G. Distribution of isolated bubble-containing fragments/zones in HCE+/-</b> | Number |
|--------------------------------------------------------------------------------|--------|
| Isolated bubble-containing fragments overlapping HCE+                          | 21036  |
| Isolated bubble-containing fragments overlapping HCE-                          | 26025  |
| Zones overlapping HCE+                                                         | 13716  |
| Zones overlapping HCE-                                                         | 12188  |

| <b>H. Size distribution of origins in HCE+ and HCE-</b> | Mean # of frags | Mean size (bp) |
|---------------------------------------------------------|-----------------|----------------|
| Isolated bubble-containing fragments in HCE+            | 1.00            | 6337           |
| Isolated bubble-containing fragments in HCE-            | 1.00            | 5789           |
| Zones in HCE+ (including negative EcoRIs)               | 3.93            | 23548          |
| Zones in HCE- (including negative EcoRIs)               | 3.30            | 16585          |

**Table SIII – Significance of number of early-, mid-, and late-firing bubble-containing fragments**

|                                | # Actual | Fold-change | Mean random | SD random | p-value | Z-score |
|--------------------------------|----------|-------------|-------------|-----------|---------|---------|
| Total number of bubbles        | 123279   |             |             |           |         |         |
| Number of early-firing bubbles | 39236    | 1.53        | 25613       | 340       | < 1e-04 | 40.01   |
| Number of mid-firing bubbles   | 39313    | 0.79        | 49829       | 267       | 1.0000  | -39.40  |
| Number of late-firing bubbles  | 44527    | 0.97        | 46096       | 124       | 0.9990  | -12.68  |

**Table SIV – Statistical relationships among bubble-containing fragments, transcription units, and replication time signatures**

|                                                                          |         |
|--------------------------------------------------------------------------|---------|
| <b>A. Whole genome</b>                                                   |         |
| % of the genome represented by RefSeq genes                              | 38.65 % |
| % of the genome represented by transcribed RefSeq genes (0.6 cutoff)     | 13.07 % |
| % of the genome represented by non-transcribed RefSeq genes (0.6 cutoff) | 26.04 % |
| % of the genome that is early-replicating                                | 23.67 % |
| % transcribed RefSeq genes that are early-replicating                    | 7.63 %  |
| % non-transcribed RefSeq genes that are early-replicating                | 6.08 %  |
| % of the genome that is intergenic and early-replicating                 | 10.21 % |
| % of the genome that is mid-replicating                                  | 35.27 % |
| % transcribed RefSeq genes that are mid-replicating                      | 4.78 %  |
| % non-transcribed RefSeq genes that are mid-replicating                  | 11.26 % |
| % of the genome that is intergenic and mid-replicating                   | 19.41 % |
| % of the genome that is late-replicating                                 | 32.34 % |
| % transcribed RefSeq genes that are late-replicating                     | 0.56 %  |
| % non-transcribed RefSeq genes that are late-replicating                 | 8.16 %  |
| % of the genome that is intergenic and late-replicating                  | 23.65 % |
| % of genome with no timing data                                          | 1.42 %  |
| % of genome with unmapped contigs                                        | 7.29 %  |

|                                                                                                            |         |
|------------------------------------------------------------------------------------------------------------|---------|
| <b>B. Bubble-containing fragment distributions</b>                                                         |         |
| Number of mapped bubble-containing fragments                                                               | 123297  |
| % of the genome represented by bubble-containing fragments                                                 | 24.35 % |
| % of the genome represented by early-firing bubble-containing fragments                                    | 8.63 %  |
| % of the genome represented by early-firing bubble-containing fragments that overlap transcribed genes     | 2.98 %  |
| % of the genome represented by early-firing bubble-containing fragments that overlap non-transcribed genes | 1.99 %  |
| % of the genome represented by early-firing bubble-containing fragments that are intergenic                | 3.75 %  |
| % of the genome represented by mid-firing bubble-containing fragments                                      | 7.60 %  |
| % of the genome represented by mid-firing bubble-containing fragments that overlap transcribed genes       | 1.12 %  |
| % of the genome represented by mid-firing bubble-containing fragments that overlap non-transcribed genes   | 2.36 %  |
| % of the genome represented by mid-firing bubble-containing fragments that are intergenic                  | 4.17 %  |
| % of the genome represented by late-firing bubble-containing fragments                                     | 8.12 %  |
| % of the genome represented by late-firing bubble-containing fragments that overlap transcribed genes      | 0.11 %  |
| % of the genome represented by late-firing bubble-containing fragments that overlap non-transcribed genes  | 1.95 %  |
| % of the genome represented by late-firing bubble-containing fragments that are intergenic                 | 6.06 %  |



|                                            |       |
|--------------------------------------------|-------|
| <b>C. Individual GM06990 libraries</b>     |       |
| Number of B1A bubbles                      | 34184 |
| % of the genome represented by B1A bubbles | 7.28  |
| Number of B1B bubbles                      | 39971 |
| % of the genome represented by B1B bubbles | 7.83  |
| Number of B2 bubbles                       | 36225 |
| % of the genome represented by B2 bubbles  | 7.84  |

**Table SV – Significance of association between bubble-containing fragments and transcription units**

**A. ALL GENOMIC BUBBLE-CONTAINING FRAGMENTS**

| Association type |                                 | # Actual | Fold-change | Mean random | SD random | p-value | Z-score | <i>Normalized to fragment number</i> |             |          |
|------------------|---------------------------------|----------|-------------|-------------|-----------|---------|---------|--------------------------------------|-------------|----------|
|                  |                                 |          |             |             |           |         |         | % Actual                             | Fold-change | % Random |
| 1                | Fragment in tx gene             | 16771    | 1.03        | 16222       | 96.88     | < 1e-04 | 5.66    | 13.60%                               | 1.03        | 13.20%   |
| 2                | Tx gene(s) in fragment          | 751      | 1.77        | 424         | 17.04     | < 1e-04 | 19.22   | 0.60%                                | 1.77        | 0.30%    |
| 3                | Frag overlaps 5' tx gene(s)     | 4013     | 1.80        | 2229        | 37.51     | < 1e-04 | 47.56   | 3.30%                                | 1.80        | 1.80%    |
| 4                | Frag overlaps 3' tx gene(s)     | 2885     | 1.39        | 2070        | 36.44     | < 1e-04 | 22.36   | 2.30%                                | 1.39        | 1.70%    |
| 5                | Fragment in non-tx gene         | 27401    | 0.91        | 30159       | 118.86    | 1.0000  | -23.20  | 22.20%                               | 0.91        | 24.50%   |
| 6                | Non-tx gene(s) in fragment      | 798      | 1.21        | 659         | 22.07     | < 1e-04 | 6.31    | 0.60%                                | 1.21        | 0.50%    |
| 7                | Frag overlaps 5' non-tx gene(s) | 2951     | 1.24        | 2383        | 40.48     | < 1e-04 | 14.02   | 2.40%                                | 1.24        | 1.90%    |
| 8                | Frag overlaps 3' non-tx gene(s) | 2235     | 1.04        | 2159        | 38.98     | 0.0255  | 1.96    | 1.80%                                | 1.03        | 1.80%    |
| 9                | Intergenic                      | 65492    | 0.98        | 66992       | 132.71    | 1.0000  | -11.30  | 53.10%                               | 0.98        | 54.30%   |
|                  | Total                           | 123297   |             | 123298      |           |         |         | 100.00%                              |             | 100.00%  |

**B. EARLY-FIRING BUBBLE-CONTAINING FRAGMENTS**

| Association type |                                 | # Actual | Fold-change | Mean random | SD random | p-value | Z-score | <i>Normalized to fragment number</i> |             |          |
|------------------|---------------------------------|----------|-------------|-------------|-----------|---------|---------|--------------------------------------|-------------|----------|
|                  |                                 |          |             |             |           |         |         | % Actual                             | Fold-change | % Random |
| 1                | Fragment in tx gene             | 10981    | 1.46        | 7509        | 105.71    | < 1e-04 | 32.84   | 28.00%                               | 0.95        | 29.30%   |
| 2                | Tx gene(s) in fragment          | 635      | 2.19        | 289         | 14.31     | < 1e-04 | 24.14   | 1.60%                                | 1.43        | 1.10%    |
| 3                | Frag overlaps 5' tx gene(s)     | 2907     | 2.27        | 1277        | 31.71     | < 1e-04 | 51.37   | 7.40%                                | 1.49        | 5.00%    |
| 4                | Frag overlaps 3' tx gene(s)     | 2211     | 1.88        | 1175        | 29.68     | < 1e-04 | 34.90   | 5.60%                                | 1.23        | 4.60%    |
| 5                | Fragment in non-tx gene         | 6423     | 1.25        | 5127        | 92.32     | 0.0010  | 14.03   | 16.40%                               | 0.82        | 20.00%   |
| 6                | Non-tx gene(s) in fragment      | 392      | 1.72        | 227         | 13.53     | < 1e-04 | 12.16   | 1.00%                                | 1.13        | 0.90%    |
| 7                | Frag overlaps 5' non-tx gene(s) | 1423     | 1.66        | 857         | 26.23     | < 1e-04 | 21.58   | 3.60%                                | 1.08        | 3.30%    |
| 8                | Frag overlaps 3' non-tx gene(s) | 1067     | 1.47        | 728         | 24.18     | < 1e-04 | 14.02   | 2.70%                                | 0.96        | 2.80%    |
| 9                | Intergenic                      | 13197    | 1.57        | 8421        | 148.42    | < 1e-04 | 32.18   | 33.60%                               | 1.02        | 32.90%   |
|                  | Total                           | 39236    |             | 25610       |           |         |         | 100.00%                              |             | 100.00%  |

### C. MID-FIRING BUBBLE-CONTAINING FRAGMENTS

| Association type |                                 | # Actual | Fold-change | Mean random | SD random | p-value | Z-score | Normalized to fragment number |             |          |
|------------------|---------------------------------|----------|-------------|-------------|-----------|---------|---------|-------------------------------|-------------|----------|
|                  |                                 |          |             |             |           |         |         | % Actual                      | Fold-change | % Random |
| 1                | Fragment in tx gene             | 5173     | 0.67        | 7680        | 102.78    | 1.0000  | -24.39  | 13.20%                        | 0.85        | 15.40%   |
| 2                | Tx gene(s) in fragment          | 103      | 0.91        | 113         | 9.64      | 0.8754  | -1.07   | 0.30%                         | 1.16        | 0.20%    |
| 3                | Frag overlaps 5' tx gene(s)     | 985      | 1.19        | 831         | 27.60     | < 1e-04 | 5.58    | 2.50%                         | 1.50        | 1.70%    |
| 4                | Frag overlaps 3' tx gene(s)     | 613      | 0.78        | 788         | 25.76     | 0.9990  | -6.79   | 1.60%                         | 0.99        | 1.60%    |
| 5                | Fragment in non-tx gene         | 10699    | 0.77        | 13880       | 101.48    | 1.0000  | -31.35  | 27.20%                        | 0.98        | 27.90%   |
| 6                | Non-tx gene(s) in fragment      | 258      | 0.89        | 289         | 15.07     | 0.9795  | -2.07   | 0.70%                         | 1.13        | 0.60%    |
| 7                | Frag overlaps 5' non-tx gene(s) | 1086     | 0.96        | 1128        | 30.02     | 0.9296  | -1.39   | 2.80%                         | 1.22        | 2.30%    |
| 8                | Frag overlaps 3' non-tx gene(s) | 877      | 0.83        | 1053        | 28.87     | 0.9991  | -6.11   | 2.20%                         | 1.06        | 2.10%    |
| 9                | Intergenic                      | 19519    | 0.81        | 24067       | 136.48    | 1.0000  | -33.32  | 49.70%                        | 1.03        | 48.30%   |
|                  | Total                           | 39313    |             | 49829       |           |         |         | 100.00%                       |             | 100.00%  |

### D. LATE-FIRING BUBBLE-CONTAINING FRAGMENTS

| Association type |                                 | # Actual | Fold-change | Mean random | SD random | p-value | Z-score | Normalized to fragment number |             |          |
|------------------|---------------------------------|----------|-------------|-------------|-----------|---------|---------|-------------------------------|-------------|----------|
|                  |                                 |          |             |             |           |         |         | % Actual                      | Fold-change | % Random |
| 1                | Fragment in tx gene             | 606      | 0.65        | 930         | 27.85     | 1.0000  | -11.67  | 1.40%                         | 0.67        | 2.00%    |
| 2                | Tx gene(s) in fragment          | 13       | 0.69        | 19          | 3.93      | 0.9540  | -1.49   | 0.00%                         | 0.68        | 0.00%    |
| 3                | Frag overlaps 5' tx gene(s)     | 121      | 1.06        | 115         | 9.47      | 0.2631  | 0.68    | 0.30%                         | 1.09        | 0.20%    |
| 4                | Frag overlaps 3' tx gene(s)     | 61       | 0.59        | 103         | 8.84      | 0.9995  | -4.74   | 0.10%                         | 0.61        | 0.20%    |
| 5                | Fragment in non-tx gene         | 10236    | 0.94        | 10916       | 72.37     | 0.9998  | -9.40   | 23.00%                        | 0.97        | 23.70%   |
| 6                | Non-tx gene(s) in fragment      | 148      | 1.15        | 128         | 9.73      | 0.0282  | 2.02    | 0.30%                         | 1.20        | 0.30%    |
| 7                | Frag overlaps 5' non-tx gene(s) | 442      | 1.18        | 375         | 17.10     | < 1e-04 | 3.94    | 1.00%                         | 1.22        | 0.80%    |
| 8                | Frag overlaps 3' non-tx gene(s) | 291      | 0.81        | 358         | 16.66     | 0.9999  | -4.03   | 0.70%                         | 0.84        | 0.80%    |
| 9                | Intergenic                      | 32609    | 0.98        | 33152       | 105.80    | 0.9990  | -5.13   | 73.20%                        | 1.02        | 71.90%   |
|                  | Total                           | 44527    |             | 46096       |           |         |         | 100.00%                       |             | 100.00%  |

**Table SVI – Significance of origin-factor overlaps**

| A. All bubble-containing frags |                                   | # Actual | Fold-change | Mean random | SD random | p-value | Z-score | Normalized to fragment number |             |          |
|--------------------------------|-----------------------------------|----------|-------------|-------------|-----------|---------|---------|-------------------------------|-------------|----------|
| Overlaps with:                 |                                   |          |             |             |           |         |         | % actual                      | Fold-change | % random |
|                                | Total bubble-containing fragments | 123297   |             | 121538      |           |         |         |                               |             |          |
| 1                              | GM Ctf rep1 broadpeak             | 45788    | 1.13        | 40652       | 132.57    | < 1e-04 | 38.74   | 37%                           | 1.11        | 33%      |
| 2                              | GM Ctf rep1 narrowpeak            | 17994    | 1.26        | 14273       | 88.76     | < 1e-04 | 41.92   | 15%                           | 1.24        | 12%      |
| 3                              | GM DNaseI HSS rep1 broadpeak      | 35931    | 1.29        | 27948       | 111.61    | < 1e-04 | 71.53   | 29%                           | 1.27        | 23%      |
| 4                              | GM DNaseI HSS rep1 narrowpeak     | 21905    | 1.41        | 15515       | 89.80     | < 1e-04 | 71.16   | 18%                           | 1.39        | 13%      |
| 5                              | GM DNaseI HSS rep2 broadpeak      | 39059    | 1.22        | 31976       | 115.96    | < 1e-04 | 61.08   | 32%                           | 1.20        | 26%      |
| 6                              | GM DNaseI HSS rep2 narrowpeak     | 20953    | 1.39        | 15067       | 88.94     | < 1e-04 | 66.18   | 17%                           | 1.37        | 12%      |
| 7                              | GM H3k27me3 rep1 broadpeak        | 44096    | 1.00        | 43923       | 128.56    | 0.0935  | 1.34    | 36%                           | 0.99        | 36%      |
| 8                              | GM H3k27me3 rep1 narrowpeak       | 4638     | 1.14        | 4084        | 50.78     | < 1e-04 | 10.92   | 4%                            | 1.12        | 3%       |
| 9                              | GM H3k27me3 rep2 broadpeak        | 38723    | 0.99        | 38933       | 123.94    | 0.9532  | -1.70   | 31%                           | 0.98        | 32%      |
| 10                             | GM H3k36me3 rep1 broadpeak        | 39879    | 1.19        | 33605       | 120.00    | < 1e-04 | 52.28   | 32%                           | 1.17        | 28%      |
| 11                             | GM H3k36me3 rep1 narrowpeak       | 14549    | 1.29        | 11322       | 79.65     | < 1e-04 | 40.51   | 12%                           | 1.27        | 9%       |
| 12                             | GM H3k36me3 rep2 broadpeak        | 45081    | 1.17        | 38489       | 123.44    | < 1e-04 | 53.40   | 37%                           | 1.15        | 32%      |
| 13                             | GM H3k4me3 rep1 broadpeak         | 19284    | 1.44        | 13436       | 86.76     | < 1e-04 | 67.41   | 16%                           | 1.41        | 11%      |
| 14                             | GM H3k4me3 rep1 narrowpeak        | 12912    | 1.55        | 8343        | 69.53     | < 1e-04 | 65.71   | 11%                           | 1.53        | 7%       |
| 15                             | GM H3k4me3 rep2 broadpeak         | 20650    | 1.41        | 14677       | 90.27     | < 1e-04 | 66.17   | 17%                           | 1.39        | 12%      |

| B. Early-firing bubbles |                               | # Actual | Fold-change | Mean random | SD random | p-value | Z-score | Normalized to fragment number |             |          |
|-------------------------|-------------------------------|----------|-------------|-------------|-----------|---------|---------|-------------------------------|-------------|----------|
| Overlaps with:          |                               |          |             |             |           |         |         | % actual                      | Fold-change | % random |
|                         | Total early-firing fragments  | 39236    |             | 25610       |           |         |         |                               |             |          |
| 1                       | GM Ctf rep1 broadpeak         | 20598    | 1.68        | 12285       | 162.04    | < 1e-04 | 51.30   | 53%                           | 1.09        | 48%      |
| 2                       | GM Ctf rep1 narrowpeak        | 10232    | 1.80        | 5691        | 84.59     | < 1e-04 | 53.68   | 26%                           | 1.17        | 22%      |
| 3                       | GM DNaseI HSS rep1 broadpeak  | 21941    | 1.80        | 12174       | 159.62    | < 1e-04 | 61.19   | 56%                           | 1.18        | 48%      |
| 4                       | GM DNaseI HSS rep1 narrowpeak | 14551    | 1.93        | 7540        | 105.38    | < 1e-04 | 66.53   | 37%                           | 1.26        | 29%      |
| 5                       | GM DNaseI HSS rep2 broadpeak  | 23402    | 1.72        | 13595       | 173.30    | < 1e-04 | 56.59   | 60%                           | 1.12        | 53%      |
| 6                       | GM DNaseI HSS rep2 narrowpeak | 13912    | 1.90        | 7312        | 103.02    | < 1e-04 | 64.07   | 35%                           | 1.24        | 29%      |
| 7                       | GM H3k27me3 rep1 broadpeak    | 13626    | 1.47        | 9299        | 144.75    | < 1e-04 | 29.89   | 35%                           | 0.96        | 36%      |
| 8                       | GM H3k27me3 rep1 narrowpeak   | 2075     | 1.54        | 1351        | 33.46     | < 1e-04 | 21.65   | 5%                            | 1.00        | 5%       |
| 9                       | GM H3k27me3 rep2 broadpeak    | 11170    | 1.44        | 7776        | 126.11    | 0.0004  | 26.91   | 29%                           | 0.94        | 30%      |
| 10                      | GM H3k36me3 rep1 broadpeak    | 24679    | 1.65        | 14939       | 185.57    | < 1e-04 | 52.49   | 63%                           | 1.08        | 58%      |
| 11                      | GM H3k36me3 rep1 narrowpeak   | 10470    | 1.71        | 6108        | 84.20     | < 1e-04 | 51.81   | 27%                           | 1.12        | 24%      |
| 12                      | GM H3k36me3 rep2 broadpeak    | 26223    | 1.64        | 15958       | 199.39    | < 1e-04 | 51.49   | 67%                           | 1.07        | 62%      |
| 13                      | GM H3k4me3 rep1 broadpeak     | 13102    | 1.96        | 6696        | 96.80     | < 1e-04 | 66.18   | 33%                           | 1.28        | 26%      |
| 14                      | GM H3k4me3 rep1 narrowpeak    | 9020     | 2.06        | 4380        | 69.53     | < 1e-04 | 66.74   | 23%                           | 1.34        | 17%      |
| 15                      | GM H3k4me3 rep2 broadpeak     | 13738    | 1.94        | 7099        | 102.20    | < 1e-04 | 64.96   | 35%                           | 1.26        | 28%      |

| <b>C. Mid-firing bubbles</b><br>Overlaps with: |                               | # Actual | Fold-change | Mean random | SD random | p-value | Z-score | <i>Normalized to fragment number</i><br>% actual Fold-change % random |      |     |
|------------------------------------------------|-------------------------------|----------|-------------|-------------|-----------|---------|---------|-----------------------------------------------------------------------|------|-----|
|                                                | Total mid-firing fragments    | 39313    |             | 49829       |           |         |         |                                                                       |      |     |
| 1                                              | GM Ctf rep1 broadpeak         | 15213    | 0.83        | 18299       | 153.48    | 0.9990  | -20.11  | 39%                                                                   | 1.05 | 37% |
| 2                                              | GM Ctf rep1 narrowpeak        | 5728     | 0.87        | 6559        | 84.31     | 0.9990  | -9.86   | 15%                                                                   | 1.11 | 13% |
| 3                                              | GM DNaseI HSS rep1 broadpeak  | 11398    | 0.87        | 13067       | 149.80    | 0.9990  | -11.14  | 29%                                                                   | 1.11 | 26% |
| 4                                              | GM DNaseI HSS rep1 narrowpeak | 6232     | 0.91        | 6823        | 100.15    | 0.9990  | -5.91   | 16%                                                                   | 1.16 | 14% |
| 5                                              | GM DNaseI HSS rep2 broadpeak  | 12825    | 0.84        | 15234       | 164.18    | 0.9990  | -14.68  | 33%                                                                   | 1.07 | 31% |
| 6                                              | GM DNaseI HSS rep2 narrowpeak | 5986     | 0.90        | 6633        | 97.62     | 0.9990  | -6.62   | 15%                                                                   | 1.14 | 13% |
| 7                                              | GM H3k27me3 rep1 broadpeak    | 20446    | 0.83        | 24530       | 142.08    | 1.0000  | -28.75  | 52%                                                                   | 1.06 | 49% |
| 8                                              | GM H3k27me3 rep1 narrowpeak   | 1939     | 0.87        | 2218        | 41.74     | 0.9990  | -6.68   | 5%                                                                    | 1.11 | 5%  |
| 9                                              | GM H3k27me3 rep2 broadpeak    | 18394    | 0.84        | 21971       | 128.80    | 1.0000  | -27.77  | 47%                                                                   | 1.06 | 44% |
| 10                                             | GM H3k36me3 rep1 broadpeak    | 12750    | 0.80        | 15916       | 174.62    | 0.9990  | -18.13  | 32%                                                                   | 1.02 | 32% |
| 11                                             | GM H3k36me3 rep1 narrowpeak   | 3674     | 0.78        | 4701        | 78.17     | 0.9990  | -13.14  | 9%                                                                    | 0.99 | 9%  |
| 12                                             | GM H3k36me3 rep2 broadpeak    | 15030    | 0.81        | 18557       | 185.84    | 0.9990  | -18.98  | 38%                                                                   | 1.03 | 37% |
| 13                                             | GM H3k4me3 rep1 broadpeak     | 5217     | 0.91        | 5751        | 90.94     | 0.9990  | -5.87   | 13%                                                                   | 1.15 | 12% |
| 14                                             | GM H3k4me3 rep1 narrowpeak    | 3358     | 0.98        | 3417        | 64.59     | 0.8924  | -0.92   | 9%                                                                    | 1.25 | 7%  |
| 15                                             | GM H3k4me3 rep2 broadpeak     | 5771     | 0.90        | 6411        | 96.40     | 0.9990  | -6.64   | 15%                                                                   | 1.14 | 13% |

| <b>D. Late-firing bubbles</b><br>Overlaps with: |                               | # Actual | Fold-change | Mean random | SD random | p-value | Z-score | <i>Normalized to fragment number</i><br>% actual Fold-change % random |      |     |
|-------------------------------------------------|-------------------------------|----------|-------------|-------------|-----------|---------|---------|-----------------------------------------------------------------------|------|-----|
|                                                 | Total late-firing fragments   | 44527    |             | 46096       |           |         |         |                                                                       |      |     |
| 1                                               | GM Ctf rep1 broadpeak         | 9968     | 0.99        | 10049       | 82.21     | 0.8565  | -0.98   | 22%                                                                   | 1.03 | 22% |
| 2                                               | GM Ctf rep1 narrowpeak        | 2034     | 1.01        | 2018        | 39.26     | 0.3401  | 0.42    | 5%                                                                    | 1.04 | 4%  |
| 3                                               | GM DNaseI HSS rep1 broadpeak  | 2590     | 0.96        | 2687        | 48.99     | 0.9856  | -1.97   | 6%                                                                    | 1.00 | 6%  |
| 4                                               | GM DNaseI HSS rep1 narrowpeak | 1121     | 0.98        | 1141        | 31.85     | 0.7558  | -0.62   | 3%                                                                    | 1.02 | 2%  |
| 5                                               | GM DNaseI HSS rep2 broadpeak  | 2828     | 0.91        | 3123        | 52.19     | 0.9990  | -5.66   | 6%                                                                    | 0.94 | 7%  |
| 6                                               | GM DNaseI HSS rep2 narrowpeak | 1054     | 0.95        | 1112        | 31.61     | 0.9781  | -1.84   | 2%                                                                    | 0.98 | 2%  |
| 7                                               | GM H3k27me3 rep1 broadpeak    | 10022    | 0.99        | 10085       | 80.72     | 0.8085  | -0.77   | 23%                                                                   | 1.03 | 22% |
| 8                                               | GM H3k27me3 rep1 narrowpeak   | 624      | 1.21        | 514         | 19.81     | < 1e-04 | 5.54    | 1%                                                                    | 1.26 | 1%  |
| 9                                               | GM H3k27me3 rep2 broadpeak    | 9154     | 1.00        | 9180        | 76.17     | 0.6479  | -0.34   | 21%                                                                   | 1.03 | 20% |
| 10                                              | GM H3k36me3 rep1 broadpeak    | 2447     | 0.90        | 2727        | 49.36     | 0.9990  | -5.67   | 5%                                                                    | 0.93 | 6%  |
| 11                                              | GM H3k36me3 rep1 narrowpeak   | 404      | 0.79        | 509         | 20.65     | 0.9990  | -5.06   | 1%                                                                    | 0.82 | 1%  |
| 12                                              | GM H3k36me3 rep2 broadpeak    | 3824     | 0.97        | 3952        | 57.79     | 0.9931  | -2.22   | 9%                                                                    | 1.00 | 9%  |
| 13                                              | GM H3k4me3 rep1 broadpeak     | 963      | 0.99        | 977         | 29.36     | 0.6971  | -0.47   | 2%                                                                    | 1.02 | 2%  |
| 14                                              | GM H3k4me3 rep1 narrowpeak    | 532      | 0.99        | 538         | 21.33     | 0.6308  | -0.29   | 1%                                                                    | 1.02 | 1%  |
| 15                                              | GM H3k4me3 rep2 broadpeak     | 1137     | 0.98        | 1155        | 31.97     | 0.7320  | -0.55   | 3%                                                                    | 1.02 | 3%  |

**Table SVII – Summary of overlaps between bubble-containing fragments and epigenetic factors**

| <b>A. All bubble containing fragments (123297)</b> |                                               | # Bubble overlaps | # Bubbles | % Bubbles | # Factor overlaps | # Factors | % Factors |
|----------------------------------------------------|-----------------------------------------------|-------------------|-----------|-----------|-------------------|-----------|-----------|
| 1                                                  | Overlaps with GM Ctf rep1 broadpeak           | 45788             | 123297    | 37.14     | 76466             | 216126    | 35.38     |
| 2                                                  | Overlaps with GM Ctf rep1 narrowpeak          | 17994             | 123297    | 14.59     | 24836             | 60662     | 40.94     |
| 3                                                  | Overlaps with GM DNaseI hyper rep1 broadpeak  | 35931             | 123297    | 29.14     | 74840             | 160648    | 46.59     |
| 4                                                  | Overlaps with GM DNaseI hyper rep1 narrowpeak | 21905             | 123297    | 17.77     | 42511             | 84278     | 50.44     |
| 5                                                  | Overlaps with GM DNaseI hyper rep2 broadpeak  | 39059             | 123297    | 31.68     | 86715             | 198915    | 43.59     |
| 6                                                  | Overlaps with GM DNaseI hyper rep2 narrowpeak | 20953             | 123297    | 16.99     | 40143             | 81480     | 49.27     |
| 7                                                  | Overlaps with GM H3k27me3 rep1 broadpeak      | 44096             | 123297    | 35.76     | 127796            | 443030    | 28.85     |
| 8                                                  | Overlaps with GM H3k27me3 rep1 narrowpeak     | 4638              | 123297    | 3.76      | 7297              | 19303     | 37.80     |
| 9                                                  | Overlaps with GM H3k27me3 rep2 broadpeak      | 38723             | 123297    | 31.41     | 93933             | 342242    | 27.45     |
| 10                                                 | Overlaps with GM H3k36me3 rep1 broadpeak      | 39879             | 123297    | 32.34     | 124287            | 328303    | 37.86     |
| 11                                                 | Overlaps with GM H3k36me3 rep1 narrowpeak     | 14549             | 123297    | 11.80     | 42384             | 84906     | 49.92     |
| 12                                                 | Overlaps with GM H3k36me3 rep2 broadpeak      | 45081             | 123297    | 36.56     | 134106            | 354850    | 37.79     |
| 13                                                 | Overlaps with GM H3k4me3 rep1 broadpeak       | 19284             | 123297    | 15.64     | 33074             | 63090     | 52.42     |
| 14                                                 | Overlaps with GM H3k4me3 rep1 narrowpeak      | 12912             | 123297    | 10.47     | 35805             | 61792     | 57.94     |
| 15                                                 | Overlaps with GM H3k4me3 rep2 broadpeak       | 20650             | 123297    | 16.75     | 34856             | 67797     | 51.41     |

| <b>B. All bubble-containing fragments in HCE+ (65009)</b> |                                               | # Bubble overlaps | # Bubbles | % Bubbles | # Factor overlaps | # Factors | % Factors |
|-----------------------------------------------------------|-----------------------------------------------|-------------------|-----------|-----------|-------------------|-----------|-----------|
| 1                                                         | Overlaps with GM Ctf rep1 broadpeak           | 30003             | 65009     | 46.15     | 53979             | 134,340   | 40.18     |
| 2                                                         | Overlaps with GM Ctf rep1 narrowpeak          | 13582             | 65009     | 20.89     | 19279             | 42,706    | 45.14     |
| 3                                                         | Overlaps with GM DNaseI hyper rep1 broadpeak  | 27983             | 65009     | 43.04     | 60579             | 121,309   | 49.94     |
| 4                                                         | Overlaps with GM DNaseI hyper rep1 narrowpeak | 17442             | 65009     | 26.83     | 34857             | 65,713    | 53.04     |
| 5                                                         | Overlaps with GM DNaseI hyper rep2 broadpeak  | 30474             | 65009     | 46.88     | 70438             | 150,183   | 46.90     |
| 6                                                         | Overlaps with GM DNaseI hyper rep2 narrowpeak | 16766             | 65009     | 25.79     | 33073             | 63,495    | 52.09     |
| 7                                                         | Overlaps with GM H3k27me3 rep1 broadpeak      | 28456             | 65009     | 43.77     | 89687             | 286,530   | 31.30     |

|    |                                           |       |       |       |        |         |       |
|----|-------------------------------------------|-------|-------|-------|--------|---------|-------|
| 8  | Overlaps with GM H3k27me3 rep1 narrowpeak | 3436  | 65009 | 5.29  | 5472   | 13,800  | 39.65 |
| 9  | Overlaps with GM H3k27me3 rep2 broadpeak  | 24712 | 65009 | 38.01 | 64430  | 218,916 | 29.43 |
| 10 | Overlaps with GM H3k36me3 rep1 broadpeak  | 31599 | 65009 | 48.61 | 102274 | 253,264 | 40.38 |
| 11 | Overlaps with GM H3k36me3 rep1 narrowpeak | 12210 | 65009 | 18.78 | 36597  | 69,668  | 52.53 |
| 12 | Overlaps with GM H3k36me3 rep2 broadpeak  | 34809 | 65009 | 53.54 | 109226 | 270,642 | 40.36 |
| 13 | Overlaps with GM H3k4me3 rep1 broadpeak   | 15494 | 65009 | 23.83 | 26988  | 48,956  | 55.13 |
| 14 | Overlaps with GM H3k4me3 rep1 narrowpeak  | 10527 | 65009 | 16.19 | 29665  | 49,371  | 60.09 |
| 15 | Overlaps with GM H3k4me3 rep2 broadpeak   | 16431 | 65009 | 25.27 | 28180  | 51,933  | 54.26 |

| <b>C. All bubble-containing fragments in HCE- (58403)</b> |                                               | # Bubble overlaps | # Bubbles | % Bubbles | # Factor overlaps | # Factors | % Factors |
|-----------------------------------------------------------|-----------------------------------------------|-------------------|-----------|-----------|-------------------|-----------|-----------|
| 1                                                         | Overlaps with GM Ctcf rep1 broadpeak          | 15837             | 58403     | 27.12     | 22578             | 81,792    | 27.60     |
| 2                                                         | Overlaps with GM Ctcf rep1 narrowpeak         | 4432              | 58403     | 7.59      | 5583              | 17,957    | 31.09     |
| 3                                                         | Overlaps with GM DNaseI hyper rep1 broadpeak  | 7997              | 58403     | 13.69     | 14362             | 39,354    | 36.49     |
| 4                                                         | Overlaps with GM DNaseI hyper rep1 narrowpeak | 4495              | 58403     | 7.70      | 7724              | 18,569    | 41.60     |
| 5                                                         | Overlaps with GM DNaseI hyper rep2 broadpeak  | 8634              | 58403     | 14.78     | 16388             | 48,749    | 33.62     |
| 6                                                         | Overlaps with GM DNaseI hyper rep2 narrowpeak | 4218              | 58403     | 7.22      | 7131              | 17,987    | 39.65     |
| 7                                                         | Overlaps with GM H3k27me3 rep1 broadpeak      | 15687             | 58403     | 26.86     | 38239             | 156,520   | 24.43     |
| 8                                                         | Overlaps with GM H3k27me3 rep1 narrowpeak     | 1207              | 58403     | 2.07      | 1830              | 5,504     | 33.25     |
| 9                                                         | Overlaps with GM H3k27me3 rep2 broadpeak      | 14051             | 58403     | 24.06     | 29587             | 123,335   | 23.99     |
| 10                                                        | Overlaps with GM H3k36me3 rep1 broadpeak      | 8331              | 58403     | 14.26     | 22196             | 75,071    | 29.57     |
| 11                                                        | Overlaps with GM H3k36me3 rep1 narrowpeak     | 2362              | 58403     | 4.04      | 5884              | 15,244    | 38.60     |
| 12                                                        | Overlaps with GM H3k36me3 rep2 broadpeak      | 10335             | 58403     | 17.70     | 25088             | 84,232    | 29.78     |
| 13                                                        | Overlaps with GM H3k4me3 rep1 broadpeak       | 3819              | 58403     | 6.54      | 6138              | 14,153    | 43.37     |
| 14                                                        | Overlaps with GM H3k4me3 rep1 narrowpeak      | 2405              | 58403     | 4.12      | 6197              | 12,423    | 49.88     |
| 15                                                        | Overlaps with GM H3k4me3 rep2 broadpeak       | 4250              | 58403     | 7.28      | 6727              | 15,882    | 42.36     |



| <b>D. Early-firing bubble-containing fragments (39236)</b> |                                               | # Bubble overlaps | # Bubbles | % Bubbles | # Factor overlaps | # Factors | % Factors |
|------------------------------------------------------------|-----------------------------------------------|-------------------|-----------|-----------|-------------------|-----------|-----------|
| 1                                                          | Overlaps with GM Ctf rep1 broadpeak           | 20598             | 39236     | 52.50     | 39657             | 84,276    | 47.06     |
| 2                                                          | Overlaps with GM Ctf rep1 narrowpeak          | 10232             | 39236     | 26.08     | 15011             | 29,105    | 51.58     |
| 3                                                          | Overlaps with GM DNaseI hyper rep1 broadpeak  | 21941             | 39236     | 55.92     | 50255             | 92,916    | 54.09     |
| 4                                                          | Overlaps with GM DNaseI hyper rep1 narrowpeak | 14551             | 39236     | 37.09     | 30480             | 53,827    | 56.63     |
| 5                                                          | Overlaps with GM DNaseI hyper rep2 broadpeak  | 23402             | 39236     | 59.64     | 57416             | 111,912   | 51.30     |
| 6                                                          | Overlaps with GM DNaseI hyper rep2 narrowpeak | 13912             | 39236     | 35.46     | 28794             | 51,672    | 55.72     |
| 7                                                          | Overlaps with GM H3k27me3 rep1 broadpeak      | 13626             | 39236     | 34.73     | 43519             | 119,289   | 36.48     |
| 8                                                          | Overlaps with GM H3k27me3 rep1 narrowpeak     | 2075              | 39236     | 5.29      | 3642              | 7,839     | 46.46     |
| 9                                                          | Overlaps with GM H3k27me3 rep2 broadpeak      | 11170             | 39236     | 28.47     | 28661             | 85,511    | 33.52     |
| 10                                                         | Overlaps with GM H3k36me3 rep1 broadpeak      | 24679             | 39236     | 62.90     | 84365             | 192,769   | 43.76     |
| 11                                                         | Overlaps with GM H3k36me3 rep1 narrowpeak     | 10470             | 39236     | 26.68     | 33149             | 59,362    | 55.84     |
| 12                                                         | Overlaps with GM H3k36me3 rep2 broadpeak      | 26223             | 39236     | 66.83     | 88623             | 201,833   | 43.91     |
| 13                                                         | Overlaps with GM H3k4me3 rep1 broadpeak       | 13102             | 39236     | 33.39     | 23505             | 40,714    | 57.73     |
| 14                                                         | Overlaps with GM H3k4me3 rep1 narrowpeak      | 9020              | 39236     | 22.99     | 26243             | 42,043    | 62.42     |
| 15                                                         | Overlaps with GM H3k4me3 rep2 broadpeak       | 13738             | 39236     | 35.01     | 24377             | 42,571    | 57.26     |

| <b>E. Mid-firing bubble-containing fragments (39313)</b> |                                               | # Bubble overlaps | # Bubbles | % Bubbles | # Factor overlaps | # Factors | % Factors |
|----------------------------------------------------------|-----------------------------------------------|-------------------|-----------|-----------|-------------------|-----------|-----------|
| 1                                                        | Overlaps with GM Ctf rep1 broadpeak           | 15213             | 39313     | 38.70     | 23739             | 86,185    | 27.54     |
| 2                                                        | Overlaps with GM Ctf rep1 narrowpeak          | 5728              | 39313     | 14.57     | 7436              | 23,483    | 31.67     |
| 3                                                        | Overlaps with GM DNaseI hyper rep1 broadpeak  | 11398             | 39313     | 28.99     | 20637             | 57,005    | 36.20     |
| 4                                                        | Overlaps with GM DNaseI hyper rep1 narrowpeak | 6232              | 39313     | 15.85     | 10455             | 26,343    | 39.69     |
| 5                                                        | Overlaps with GM DNaseI hyper rep2 broadpeak  | 12825             | 39313     | 32.62     | 24820             | 72,902    | 34.05     |
| 6                                                        | Overlaps with GM DNaseI hyper rep2 narrowpeak | 5986              | 39313     | 15.23     | 9913              | 25,762    | 38.48     |
| 7                                                        | Overlaps with GM H3k27me3 rep1 broadpeak      | 20446             | 39313     | 52.01     | 61731             | 243,578   | 25.34     |
| 8                                                        | Overlaps with GM H3k27me3 rep1 narrowpeak     | 1939              | 39313     | 4.93      | 2755              | 9,029     | 30.51     |
| 9                                                        | Overlaps with GM H3k27me3 rep2 broadpeak      | 18394             | 39313     | 46.79     | 47135             | 191,378   | 24.63     |



|    |                                           |       |       |       |       |         |       |
|----|-------------------------------------------|-------|-------|-------|-------|---------|-------|
| 10 | Overlaps with GM H3k36me3 rep1 broadpeak  | 12750 | 39313 | 32.43 | 35082 | 123,340 | 28.44 |
| 11 | Overlaps with GM H3k36me3 rep1 narrowpeak | 3674  | 39313 | 9.35  | 8473  | 23,622  | 35.87 |
| 12 | Overlaps with GM H3k36me3 rep2 broadpeak  | 15030 | 39313 | 38.23 | 38749 | 135,369 | 28.62 |
| 13 | Overlaps with GM H3k4me3 rep1 broadpeak   | 5217  | 39313 | 13.27 | 8098  | 20,643  | 39.23 |
| 14 | Overlaps with GM H3k4me3 rep1 narrowpeak  | 3358  | 39313 | 8.54  | 8434  | 17,427  | 48.40 |
| 15 | Overlaps with GM H3k4me3 rep2 broadpeak   | 5771  | 39313 | 14.68 | 8837  | 23,003  | 38.42 |

| <b>F. Late-firing bubble-containing fragments (44527)</b> |                                               | # Bubble overlaps | # Bubbles | % Bubbles | # Factor overlaps | # Factors | % Factors |
|-----------------------------------------------------------|-----------------------------------------------|-------------------|-----------|-----------|-------------------|-----------|-----------|
| 1                                                         | Overlaps with GM Ctf rep1 broadpeak           | 9968              | 44527     | 22.39     | 13061             | 47,502    | 27.50     |
| 2                                                         | Overlaps with GM Ctf rep1 narrowpeak          | 2034              | 44527     | 4.57      | 2389              | 8,379     | 28.51     |
| 3                                                         | Overlaps with GM DNaseI hyper rep1 broadpeak  | 2590              | 44527     | 5.82      | 3946              | 12,924    | 30.53     |
| 4                                                         | Overlaps with GM DNaseI hyper rep1 narrowpeak | 1121              | 44527     | 2.52      | 1575              | 4,480     | 35.16     |
| 5                                                         | Overlaps with GM DNaseI hyper rep2 broadpeak  | 2828              | 44527     | 6.35      | 4475              | 16,319    | 27.42     |
| 6                                                         | Overlaps with GM DNaseI hyper rep2 narrowpeak | 1054              | 44527     | 2.37      | 1435              | 4,413     | 32.52     |
| 7                                                         | Overlaps with GM H3k27me3 rep1 broadpeak      | 10022             | 44527     | 22.51     | 22544             | 84,000    | 26.84     |
| 8                                                         | Overlaps with GM H3k27me3 rep1 narrowpeak     | 624               | 44527     | 1.40      | 900               | 2,522     | 35.69     |
| 9                                                         | Overlaps with GM H3k27me3 rep2 broadpeak      | 9154              | 44527     | 20.56     | 18132             | 68,060    | 26.64     |
| 10                                                        | Overlaps with GM H3k36me3 rep1 broadpeak      | 2447              | 44527     | 5.50      | 4837              | 17,063    | 28.35     |
| 11                                                        | Overlaps with GM H3k36me3 rep1 narrowpeak     | 404               | 44527     | 0.91      | 761               | 2,285     | 33.30     |
| 12                                                        | Overlaps with GM H3k36me3 rep2 broadpeak      | 3824              | 44527     | 8.59      | 6729              | 21,963    | 30.64     |
| 13                                                        | Overlaps with GM H3k4me3 rep1 broadpeak       | 963               | 44527     | 2.16      | 1469              | 3,767     | 39.00     |
| 14                                                        | Overlaps with GM H3k4me3 rep1 narrowpeak      | 532               | 44527     | 1.19      | 1125              | 2,576     | 43.67     |
| 15                                                        | Overlaps with GM H3k4me3 rep2 broadpeak       | 1137              | 44527     | 2.55      | 1637              | 4,518     | 36.23     |

| <b>G. Early-firing bubble-containing fragments in HCE+ (34752)</b> |                                               | # Bubble overlaps | # Bubbles | % Bubbles | # Factor overlaps | # Factors | % Factors |
|--------------------------------------------------------------------|-----------------------------------------------|-------------------|-----------|-----------|-------------------|-----------|-----------|
| 1                                                                  | Overlaps with GM Ctf rep1 broadpeak           | 18597             | 34752     | 53.51     | 36187             | 75,207    | 48.12     |
| 2                                                                  | Overlaps with GM Ctf rep1 narrowpeak          | 9296              | 34752     | 26.75     | 13728             | 26,171    | 52.46     |
| 3                                                                  | Overlaps with GM DNaseI hyper rep1 broadpeak  | 19735             | 34752     | 56.79     | 45420             | 82,814    | 54.85     |
| 4                                                                  | Overlaps with GM DNaseI hyper rep1 narrowpeak | 13054             | 34752     | 37.56     | 27525             | 47,982    | 57.37     |
| 5                                                                  | Overlaps with GM DNaseI hyper rep2 broadpeak  | 21028             | 34752     | 60.51     | 51865             | 99,726    | 52.01     |
| 6                                                                  | Overlaps with GM DNaseI hyper rep2 narrowpeak | 12473             | 34752     | 35.89     | 25973             | 45,986    | 56.48     |
| 7                                                                  | Overlaps with GM H3k27me3 rep1 broadpeak      | 12273             | 34752     | 35.32     | 39738             | 106,250   | 37.40     |
| 8                                                                  | Overlaps with GM H3k27me3 rep1 narrowpeak     | 1900              | 34752     | 5.47      | 3361              | 7,174     | 46.85     |
| 9                                                                  | Overlaps with GM H3k27me3 rep2 broadpeak      | 10005             | 34752     | 28.79     | 26049             | 75,818    | 34.36     |
| 10                                                                 | Overlaps with GM H3k36me3 rep1 broadpeak      | 22265             | 34752     | 64.07     | 76390             | 171,808   | 44.46     |
| 11                                                                 | Overlaps with GM H3k36me3 rep1 narrowpeak     | 9510              | 34752     | 27.37     | 30329             | 53,788    | 56.39     |
| 12                                                                 | Overlaps with GM H3k36me3 rep2 broadpeak      | 23665             | 34752     | 68.10     | 80419             | 179,963   | 44.69     |
| 13                                                                 | Overlaps with GM H3k4me3 rep1 broadpeak       | 11789             | 34752     | 33.92     | 21230             | 36,249    | 58.57     |
| 14                                                                 | Overlaps with GM H3k4me3 rep1 narrowpeak      | 8140              | 34752     | 23.42     | 23678             | 37,561    | 63.04     |
| 15                                                                 | Overlaps with GM H3k4me3 rep2 broadpeak       | 12352             | 34752     | 35.54     | 21967             | 37,777    | 58.15     |

| <b>H. Early-firing bubble-containing fragments in HCE- (4529)</b> |                                               | # Bubble overlaps | # Bubbles | % Bubbles | # Factor overlaps | # Factors | % Factors |
|-------------------------------------------------------------------|-----------------------------------------------|-------------------|-----------|-----------|-------------------|-----------|-----------|
| 1                                                                 | Overlaps with GM Ctf rep1 broadpeak           | 2030              | 4529      | 44.82     | 3530              | 9,208     | 38.34     |
| 2                                                                 | Overlaps with GM Ctf rep1 narrowpeak          | 951               | 4529      | 21.00     | 1303              | 2,982     | 43.70     |
| 3                                                                 | Overlaps with GM DNaseI hyper rep1 broadpeak  | 2235              | 4529      | 49.35     | 4898              | 10,243    | 47.82     |
| 4                                                                 | Overlaps with GM DNaseI hyper rep1 narrowpeak | 1514              | 4529      | 33.43     | 2999              | 5,944     | 50.45     |
| 5                                                                 | Overlaps with GM DNaseI hyper rep2 broadpeak  | 2403              | 4529      | 53.06     | 5621              | 12,370    | 45.44     |
| 6                                                                 | Overlaps with GM DNaseI hyper rep2 narrowpeak | 1456              | 4529      | 32.15     | 2859              | 5,774     | 49.52     |
| 7                                                                 | Overlaps with GM H3k27me3 rep1 broadpeak      | 1365              | 4529      | 30.14     | 3813              | 13,226    | 28.83     |
| 8                                                                 | Overlaps with GM H3k27me3 rep1 narrowpeak     | 176               | 4529      | 3.89      | 282               | 672       | 41.96     |
| 9                                                                 | Overlaps with GM H3k27me3 rep2 broadpeak      | 1170              | 4529      | 25.83     | 2627              | 9,823     | 26.74     |

|    |                                           |      |      |       |      |        |       |
|----|-------------------------------------------|------|------|-------|------|--------|-------|
| 10 | Overlaps with GM H3k36me3 rep1 broadpeak  | 2446 | 4529 | 54.01 | 8098 | 21,249 | 38.11 |
| 11 | Overlaps with GM H3k36me3 rep1 narrowpeak | 976  | 4529 | 21.55 | 2897 | 5,695  | 50.87 |
| 12 | Overlaps with GM H3k36me3 rep2 broadpeak  | 2594 | 4529 | 57.28 | 8349 | 22,184 | 37.64 |
| 13 | Overlaps with GM H3k4me3 rep1 broadpeak   | 1329 | 4529 | 29.34 | 2307 | 4,529  | 50.94 |
| 14 | Overlaps with GM H3k4me3 rep1 narrowpeak  | 890  | 4529 | 19.65 | 2601 | 4,555  | 57.10 |
| 15 | Overlaps with GM H3k4me3 rep2 broadpeak   | 1403 | 4529 | 30.98 | 2440 | 4,860  | 50.21 |

| <b>I. Mid-firing bubble-containing fragments in HCE+ (23955)</b> |                                               | # Bubble overlaps | # Bubbles | % Bubbles | # Factor overlaps | # Factors | % Factors |
|------------------------------------------------------------------|-----------------------------------------------|-------------------|-----------|-----------|-------------------|-----------|-----------|
| 1                                                                | Overlaps with GM Ctf rep1 broadpeak           | 9819              | 23955     | 40.99     | 15614             | 52,291    | 29.86     |
| 2                                                                | Overlaps with GM Ctf rep1 narrowpeak          | 3843              | 23955     | 16.04     | 5024              | 14,833    | 33.87     |
| 3                                                                | Overlaps with GM DNaseI hyper rep1 broadpeak  | 7598              | 23955     | 31.72     | 14073             | 36,839    | 38.20     |
| 4                                                                | Overlaps with GM DNaseI hyper rep1 narrowpeak | 4068              | 23955     | 16.98     | 6867              | 16,805    | 40.86     |
| 5                                                                | Overlaps with GM DNaseI hyper rep2 broadpeak  | 8666              | 23955     | 36.18     | 17237             | 47,811    | 36.05     |
| 6                                                                | Overlaps with GM DNaseI hyper rep2 narrowpeak | 3963              | 23955     | 16.54     | 6646              | 16,528    | 40.21     |
| 7                                                                | Overlaps with GM H3k27me3 rep1 broadpeak      | 13369             | 23955     | 55.81     | 42561             | 157,393   | 27.04     |
| 8                                                                | Overlaps with GM H3k27me3 rep1 narrowpeak     | 1333              | 23955     | 5.56      | 1848              | 5,951     | 31.05     |
| 9                                                                | Overlaps with GM H3k27me3 rep2 broadpeak      | 12091             | 23955     | 50.47     | 32383             | 123,828   | 26.15     |
| 10                                                               | Overlaps with GM H3k36me3 rep1 broadpeak      | 8677              | 23955     | 36.22     | 24434             | 80,384    | 30.40     |
| 11                                                               | Overlaps with GM H3k36me3 rep1 narrowpeak     | 2557              | 23955     | 10.67     | 5983              | 15,531    | 38.52     |
| 12                                                               | Overlaps with GM H3k36me3 rep2 broadpeak      | 10114             | 23955     | 42.22     | 26792             | 87,914    | 30.48     |
| 13                                                               | Overlaps with GM H3k4me3 rep1 broadpeak       | 3431              | 23955     | 14.32     | 5334              | 13,071    | 40.81     |
| 14                                                               | Overlaps with GM H3k4me3 rep1 narrowpeak      | 2226              | 23955     | 9.29      | 5593              | 11,264    | 49.65     |
| 15                                                               | Overlaps with GM H3k4me3 rep2 broadpeak       | 3774              | 23955     | 15.75     | 5772              | 14,613    | 39.50     |

| <b>J. Mid-firing bubble-containing fragments in HCE- (15410)</b> |                                               | # Bubble overlaps | # Bubbles | % Bubbles | # Factor overlaps | # Factors | % Factors |
|------------------------------------------------------------------|-----------------------------------------------|-------------------|-----------|-----------|-------------------|-----------|-----------|
| 1                                                                | Overlaps with GM Ctf rep1 broadpeak           | 5413              | 15410     | 35.13     | 8151              | 34,053    | 23.94     |
| 2                                                                | Overlaps with GM Ctf rep1 narrowpeak          | 1889              | 15410     | 12.26     | 2417              | 8,682     | 27.84     |
| 3                                                                | Overlaps with GM DNaseI hyper rep1 broadpeak  | 3818              | 15410     | 24.78     | 6600              | 20,268    | 32.56     |
| 4                                                                | Overlaps with GM DNaseI hyper rep1 narrowpeak | 2177              | 15410     | 14.13     | 3611              | 9,591     | 37.65     |
| 5                                                                | Overlaps with GM DNaseI hyper rep2 broadpeak  | 4176              | 15410     | 27.10     | 7619              | 25,214    | 30.22     |
| 6                                                                | Overlaps with GM DNaseI hyper rep2 narrowpeak | 2035              | 15410     | 13.21     | 3288              | 9,279     | 35.43     |
| 7                                                                | Overlaps with GM H3k27me3 rep1 broadpeak      | 7103              | 15410     | 46.09     | 19241             | 86,604    | 22.22     |
| 8                                                                | Overlaps with GM H3k27me3 rep1 narrowpeak     | 609               | 15410     | 3.95      | 910               | 3,087     | 29.48     |
| 9                                                                | Overlaps with GM H3k27me3 rep2 broadpeak      | 6329              | 15410     | 41.07     | 14807             | 67,850    | 21.82     |
| 10                                                               | Overlaps with GM H3k36me3 rep1 broadpeak      | 4091              | 15410     | 26.55     | 10707             | 43,191    | 24.79     |
| 11                                                               | Overlaps with GM H3k36me3 rep1 narrowpeak     | 1124              | 15410     | 7.29      | 2510              | 8,144     | 30.82     |
| 12                                                               | Overlaps with GM H3k36me3 rep2 broadpeak      | 4940              | 15410     | 32.06     | 12016             | 47,724    | 25.18     |
| 13                                                               | Overlaps with GM H3k4me3 rep1 broadpeak       | 1797              | 15410     | 11.66     | 2781              | 7,443     | 37.36     |
| 14                                                               | Overlaps with GM H3k4me3 rep1 narrowpeak      | 1141              | 15410     | 7.40      | 2859              | 6,198     | 46.13     |
| 15                                                               | Overlaps with GM H3k4me3 rep2 broadpeak       | 2009              | 15410     | 13.04     | 3084              | 8,436     | 36.56     |

| <b>K. Late-firing bubble-containing fragments in HCE+ (6263)</b> |                                               | # Bubble overlaps | # Bubbles | % Bubbles | # Factor overlaps | # Factors | % Factors |
|------------------------------------------------------------------|-----------------------------------------------|-------------------|-----------|-----------|-------------------|-----------|-----------|
| 1                                                                | Overlaps with GM Ctf rep1 broadpeak           | 1586              | 6263      | 25.32     | 2177              | 8,116     | 26.82     |
| 2                                                                | Overlaps with GM Ctf rep1 narrowpeak          | 443               | 6263      | 7.07      | 527               | 1,907     | 27.64     |
| 3                                                                | Overlaps with GM DNaseI hyper rep1 broadpeak  | 649               | 6263      | 10.36     | 1085              | 3,275     | 33.13     |
| 4                                                                | Overlaps with GM DNaseI hyper rep1 narrowpeak | 319               | 6263      | 5.09      | 464               | 1,258     | 36.88     |
| 5                                                                | Overlaps with GM DNaseI hyper rep2 broadpeak  | 777               | 6263      | 12.41     | 1333              | 4,336     | 30.74     |
| 6                                                                | Overlaps with GM DNaseI hyper rep2 narrowpeak | 329               | 6263      | 5.25      | 453               | 1,312     | 34.53     |
| 7                                                                | Overlaps with GM H3k27me3 rep1 broadpeak      | 2813              | 6263      | 44.91     | 7387              | 25,704    | 28.74     |
| 8                                                                | Overlaps with GM H3k27me3 rep1 narrowpeak     | 203               | 6263      | 3.24      | 263               | 742       | 35.44     |
| 9                                                                | Overlaps with GM H3k27me3 rep2 broadpeak      | 2614              | 6263      | 41.74     | 5996              | 21,259    | 28.20     |

|    |                                           |      |      |       |      |       |       |
|----|-------------------------------------------|------|------|-------|------|-------|-------|
| 10 | Overlaps with GM H3k36me3 rep1 broadpeak  | 654  | 6263 | 10.44 | 1447 | 4,893 | 29.57 |
| 11 | Overlaps with GM H3k36me3 rep1 narrowpeak | 142  | 6263 | 2.27  | 284  | 711   | 39.94 |
| 12 | Overlaps with GM H3k36me3 rep2 broadpeak  | 1026 | 6263 | 16.38 | 5996 | 6,206 | 96.62 |
| 13 | Overlaps with GM H3k4me3 rep1 broadpeak   | 272  | 6263 | 4.34  | 422  | 1,010 | 41.78 |
| 14 | Overlaps with GM H3k4me3 rep1 narrowpeak  | 159  | 6263 | 2.54  | 391  | 792   | 49.37 |
| 15 | Overlaps with GM H3k4me3 rep2 broadpeak   | 302  | 6263 | 4.82  | 437  | 1,206 | 36.24 |

| <b>L. Late-firing bubble-containing fragments in HCE- (38283)</b> |                                               | # Bubble overlaps | # Bubbles | % Bubbles | # Factor overlaps | # Factors | % Factors |
|-------------------------------------------------------------------|-----------------------------------------------|-------------------|-----------|-----------|-------------------|-----------|-----------|
| 1                                                                 | Overlaps with GM Ctf rep1 broadpeak           | 8386              | 38283     | 21.91     | 10889             | 39,419    | 27.62     |
| 2                                                                 | Overlaps with GM Ctf rep1 narrowpeak          | 1592              | 38283     | 4.16      | 1863              | 6,480     | 28.75     |
| 3                                                                 | Overlaps with GM DNaseI hyper rep1 broadpeak  | 1943              | 38283     | 5.08      | 2863              | 9,657     | 29.65     |
| 4                                                                 | Overlaps with GM DNaseI hyper rep1 narrowpeak | 804               | 38283     | 2.10      | 1114              | 3,227     | 34.52     |
| 5                                                                 | Overlaps with GM DNaseI hyper rep2 broadpeak  | 2054              | 38283     | 5.37      | 3147              | 11,999    | 26.23     |
| 6                                                                 | Overlaps with GM DNaseI hyper rep2 narrowpeak | 727               | 38283     | 1.90      | 984               | 3,106     | 31.68     |
| 7                                                                 | Overlaps with GM H3k27me3 rep1 broadpeak      | 7218              | 38283     | 18.85     | 15184             | 58,399    | 26.00     |
| 8                                                                 | Overlaps with GM H3k27me3 rep1 narrowpeak     | 422               | 38283     | 1.10      | 638               | 1,785     | 35.74     |
| 9                                                                 | Overlaps with GM H3k27me3 rep2 broadpeak      | 6549              | 38283     | 17.11     | 12150             | 46,873    | 25.92     |
| 10                                                                | Overlaps with GM H3k36me3 rep1 broadpeak      | 1794              | 38283     | 4.69      | 3391              | 12,178    | 27.85     |
| 11                                                                | Overlaps with GM H3k36me3 rep1 narrowpeak     | 262               | 38283     | 0.68      | 477               | 1,574     | 30.30     |
| 12                                                                | Overlaps with GM H3k36me3 rep2 broadpeak      | 2801              | 38283     | 7.32      | 4723              | 15,765    | 29.96     |
| 13                                                                | Overlaps with GM H3k4me3 rep1 broadpeak       | 693               | 38283     | 1.81      | 1050              | 2,765     | 37.97     |
| 14                                                                | Overlaps with GM H3k4me3 rep1 narrowpeak      | 374               | 38283     | 0.98      | 737               | 1,791     | 41.15     |
| 15                                                                | Overlaps with GM H3k4me3 rep2 broadpeak       | 837               | 38283     | 2.19      | 1202              | 3,317     | 36.24     |

**Table SVIII – Correlation coefficients between origin densities (whether isolated or zonal) and epigenetic factors calculated for 1 Mb intervals**

| <b>A. Non-epigenetic factor comparisons</b> |                                         | Pearson CC | p-value   | Spearman CC | Kendall CC |
|---------------------------------------------|-----------------------------------------|------------|-----------|-------------|------------|
| 1                                           | TR50 & origin density                   | -0.31      | < 2.2e-16 | -0.25       | -0.17      |
| 2                                           | TR50 & HCE (+/-)                        | -0.74      | < 2.2e-16 | -0.75       | -0.55      |
| 3                                           | Origin density & HCE (+/-)              | 0.26       | < 2.2e-16 | 0.25        | 0.16       |
| 4                                           | Origin density & abs HCE                | 0.50       | < 2.2e-16 | 0.49        | 0.34       |
| 5                                           | Avg RDs & TR50                          | 0.09       | 6.47e-07  | 0.17        | 0.11       |
| 6                                           | Avg origin RDs & HCE (+/-)              | -0.04      | 0.01343   | -0.05       | -0.03      |
| 7                                           | Isolated origin density & HCE (+/-)     | -0.19      | < 2.2e-16 | -0.22       | -0.15      |
| 8                                           | Isolated origin density & abs HCE       | 0.26       | < 2.2e-16 | 0.21        | 0.14       |
| 9                                           | Zonal origin density & HCE (+/-)        | 0.35       | < 2.2e-16 | 0.30        | 0.20       |
| 10                                          | Zonal origin density & abs HCE          | 0.45       | < 2.2e-16 | 0.46        | 0.32       |
| 11                                          | Early-firing origin density & HCE (+/-) | 0.58       | < 2.2e-16 | 0.65        | 0.47       |
| 12                                          | Mid-firing origin density & HCE (+/-)   | 0.19       | < 2.2e-16 | 0.18        | 0.13       |
| 13                                          | Late-firing origin density & HCE (+/-)  | -0.48      | < 2.2e-16 | -0.53       | -0.37      |

| <b>B. CTCF</b> |                                                      | Pearson CC | p-value   | Spearman CC | Kendall CC |
|----------------|------------------------------------------------------|------------|-----------|-------------|------------|
| 1              | Rep1 broadpeak density & early-firing origin density | 0.74       | < 2.2e-16 | 0.73        | 0.53       |
| 2              | Rep1 broadpeak density & mid-firing origin density   | 0.17       | < 2.2e-16 | 0.26        | 0.18       |
| 3              | Rep1 broadpeak density & late-firing origin density  | -0.55      | < 2.2e-16 | -0.60       | -0.43      |
| 4              | Rep1 broadpeak density & origin density              | 0.58       | < 2.2e-16 | 0.46        | 0.33       |
| 5              | Rep1 broadpeak density & HCE (+/-)                   | 0.60       | < 2.2e-16 | 0.61        | 0.43       |
| 6              | Rep1 narrowpeak & early-firing origin density        | 0.78       | < 2.2e-16 | 0.76        | 0.57       |
| 7              | Rep1 narrowpeak & mid-firing origin density          | 0.18       | < 2.2e-16 | 0.26        | 0.19       |
| 8              | Rep1 narrowpeak & late-firing origin density         | -0.61      | < 2.2e-16 | -0.66       | -0.49      |
| 9              | Rep1 narrowpeak & origin density                     | 0.58       | < 2.2e-16 | 0.45        | 0.33       |
| 10             | Rep1 narrowpeak & HCE (+/-)                          | 0.64       | < 2.2e-16 | 0.65        | 0.46       |

| <b>C. DNaseI HSS</b> |                                                      | Pearson CC | p-value   | Spearman CC | Kendall CC |
|----------------------|------------------------------------------------------|------------|-----------|-------------|------------|
| 1                    | Rep1 broadpeak density & early-firing origin density | 0.87       | < 2.2e-16 | 0.86        | 0.67       |
| 2                    | Rep1 broadpeak density & mid-firing origin density   | 0.06       | 0.002223  | 0.22        | 0.16       |
| 3                    | Rep1 broadpeak density & late-firing origin density  | -0.57      | < 2.2e-16 | -0.77       | -0.57      |
| 4                    | Rep1 broadpeak density & origin density              | 0.59       | < 2.2e-16 | 0.42        | 0.31       |
| 5                    | Rep1 broadpeak density & HCE (+/-)                   | 0.63       | < 2.2e-16 | 0.67        | 0.48       |
| 6                    | Rep2 broadpeak density & early-firing origin density | 0.86       | < 2.2e-16 | 0.86        | 0.68       |
| 7                    | Rep2 broadpeak density & mid-firing origin density   | 0.05       | 0.01678   | 0.20        | 0.14       |
| 8                    | Rep2 broadpeak density & late-firing                 | -0.57      | < 2.2e-16 | -0.77       | -0.58      |

|    |                                               |       |           |       |       |
|----|-----------------------------------------------|-------|-----------|-------|-------|
|    | origin density                                |       |           |       |       |
| 9  | Rep2 broadpeak density & origin density       | 0.59  | < 2.2e-16 | 0.41  | 0.30  |
| 10 | Rep2 broadpeak density & HCE                  | 0.64  | < 2.2e-16 | 0.68  | 0.48  |
| 11 | Rep1 narrowpeak & early-firing origin density | 0.85  | < 2.2e-16 | 0.86  | 0.66  |
| 12 | Rep1 narrowpeak & mid-firing origin density   | 0.04  | 0.08435   | 0.19  | 0.14  |
| 13 | Rep1 narrowpeak & late-firing origin density  | -0.58 | < 2.2e-16 | -0.76 | -0.57 |
| 14 | Rep1 narrowpeak & origin density              | 0.55  | < 2.2e-16 | 0.40  | 0.29  |
| 15 | Rep1 narrowpeak & HCE (+/-)                   | 0.64  | < 2.2e-16 | 0.67  | 0.48  |
| 16 | Rep2 narrowpeak & early-firing origin density | 0.83  | < 2.2e-16 | 0.85  | 0.66  |
| 17 | Rep2 narrowpeak & mid-firing origin density   | 0.02  | 0.3945    | 0.18  | 0.12  |
| 18 | Rep2 narrowpeak & late-firing origin density  | -0.59 | < 2.2e-16 | -0.75 | -0.57 |
| 19 | Rep2 narrowpeak & origin density              | 0.53  | < 2.2e-16 | 0.38  | 0.27  |
| 20 | Rep2 narrowpeak & HCE (+/-)                   | 0.64  | < 2.2e-16 | 0.68  | 0.49  |

| <b>D. H3K27me3</b> |                                                      | Pearson CC | p-value   | Spearman CC | Kendall CC |
|--------------------|------------------------------------------------------|------------|-----------|-------------|------------|
| 1                  | Rep1 broadpeak density & early-firing origin density | 0.21       | < 2.2e-16 | 0.34        | 0.23       |
| 2                  | Rep1 broadpeak density & mid-firing origin density   | 0.42       | < 2.2e-16 | 0.42        | 0.30       |
| 3                  | Rep1 broadpeak density & late-firing origin density  | -0.42      | < 2.2e-16 | -0.57       | -0.41      |
| 4                  | Rep1 broadpeak density & origin density              | 0.36       | < 2.2e-16 | 0.33        | 0.23       |
| 5                  | Rep1 broadpeak density & HCE (+/-)                   | 0.46       | < 2.2e-16 | 0.51        | 0.35       |
| 6                  | Rep2 broadpeak density & early-firing origin density | 0.06       | < 2.2e-16 | 0.21        | 0.14       |
| 7                  | Rep2 broadpeak density & mid-firing origin density   | 0.40       | < 2.2e-16 | 0.43        | 0.30       |
| 8                  | Rep2 broadpeak density & late-firing origin density  | -0.42      | < 2.2e-16 | -0.55       | -0.39      |
| 9                  | Rep2 broadpeak density & origin density              | 0.23       | < 2.2e-16 | 0.24        | 0.17       |
| 10                 | Rep2 broadpeak density & HCE (+/-)                   | 0.38       | < 2.2e-16 | 0.44        | 0.29       |
| 11                 | Rep1 narrowpeak & early-firing origin density        | 0.44       | < 2.2e-16 | 0.45        | 0.32       |
| 12                 | Rep1 narrowpeak & mid-firing origin density          | 0.21       | < 2.2e-16 | 0.30        | 0.21       |
| 13                 | Rep1 narrowpeak & late-firing origin density         | -0.46      | < 2.2e-16 | -0.55       | -0.40      |
| 14                 | Rep1 narrowpeak & origin density                     | 0.38       | < 2.2e-16 | 0.29        | 0.21       |
| 15                 | Rep1 narrowpeak & HCE (+/-)                          | 0.48       | < 2.2e-16 | 0.52        | 0.37       |

| <b>E. H3K4me3</b> |                                                      | Pearson CC | p-value   | Spearman CC | Kendall CC |
|-------------------|------------------------------------------------------|------------|-----------|-------------|------------|
| 1                 | Rep1 broadpeak density & early-firing origin density | 0.84       | < 2.2e-16 | 0.85        | 0.66       |
| 2                 | Rep1 broadpeak density & mid-firing                  | 0.03       | < 2.2e-16 | 0.19        | 0.13       |



|    |                                                      |       |           |       |       |
|----|------------------------------------------------------|-------|-----------|-------|-------|
|    | origin density                                       |       |           |       |       |
| 3  | Rep1 broadpeak density & late-firing origin density  | -0.54 | < 2.2e-16 | -0.72 | -0.53 |
| 4  | Rep1 broadpeak density & origin density              | 0.56  | < 2.2e-16 | 0.40  | 0.29  |
| 5  | Rep1 broadpeak density & HCE (+/-)                   | 0.62  | < 2.2e-16 | 0.67  | 0.48  |
| 6  | Rep2 broadpeak density & early-firing origin density | 0.84  | < 2.2e-16 | 0.85  | 0.66  |
| 7  | Rep2 broadpeak density & mid-firing origin density   | 0.03  | 0.147     | 0.19  | 0.13  |
| 8  | Rep2 broadpeak density & late-firing origin density  | -0.56 | < 2.2e-16 | -0.73 | -0.54 |
| 9  | Rep2 broadpeak density & origin density              | 0.56  | < 2.2e-16 | 0.40  | 0.29  |
| 10 | Rep2 broadpeak density & HCE (+/-)                   | 0.62  | < 2.2e-16 | 0.67  | 0.48  |
| 11 | Rep1 narrowpeak & early-firing origin density        | 0.83  | < 2.2e-16 | 0.84  | 0.65  |
| 12 | Rep1 narrowpeak & mid-firing origin density          | 0.02  | 0.3726    | 0.17  | 0.12  |
| 13 | Rep1 narrowpeak & late-firing origin density         | -0.52 | < 2.2e-16 | -0.71 | -0.53 |
| 14 | Rep1 narrowpeak & origin density                     | 0.56  | < 2.2e-16 | 0.39  | 0.29  |
| 15 | Rep1 narrowpeak & HCE (+/-)                          | 0.61  | < 2.2e-16 | 0.67  | 0.49  |

| <b>F. H3K36me3</b> |                                                      | Pearson CC | p-value   | Spearman CC | Kendall CC |
|--------------------|------------------------------------------------------|------------|-----------|-------------|------------|
| 1                  | Rep1 broadpeak density & early-firing origin density | 0.85       | < 2.2e-16 | 0.82        | 0.63       |
| 2                  | Rep1 broadpeak density & mid-firing origin density   | 0.09       | 2.447e-05 | 0.22        | 0.16       |
| 3                  | Rep1 broadpeak density & late-firing origin density  | -0.50      | < 2.2e-16 | -0.66       | -0.47      |
| 4                  | Rep1 broadpeak density & origin density              | 0.60       | < 2.2e-16 | 0.45        | 0.33       |
| 5                  | Rep1 broadpeak density & HCE (+/-)                   | 0.63       | < 2.2e-16 | 0.65        | 0.47       |
| 6                  | Rep2 broadpeak density & early-firing origin density | 0.85       | < 2.2e-16 | 0.82        | 0.63       |
| 7                  | Rep2 broadpeak density & mid-firing origin density   | 0.10       | 1.729e-06 | 0.23        | 0.17       |
| 8                  | Rep2 broadpeak density & late-firing origin density  | -0.50      | < 2.2e-16 | -0.65       | -0.46      |
| 9                  | Rep2 broadpeak density & origin density              | 0.61       | < 2.2e-16 | 0.48        | 0.35       |
| 10                 | Rep2 broadpeak density & HCE (+/-)                   | 0.63       | < 2.2e-16 | 0.65        | 0.46       |
| 11                 | Rep1 narrowpeak & early-firing origin density        | 0.82       | < 2.2e-16 | 0.79        | 0.61       |
| 12                 | Rep1 narrowpeak & mid-firing origin density          | 0.05       | 0.008073  | 0.20        | 0.14       |
| 13                 | Rep1 narrowpeak & late-firing origin density         | -0.44      | < 2.2e-16 | -0.64       | -0.48      |
| 14                 | Rep1 narrowpeak & origin density                     | 0.60       | < 2.2e-16 | 0.42        | 0.32       |
| 15                 | Rep1 narrowpeak & HCE (+/-)                          | 0.57       | < 2.2e-16 | 0.65        | 0.48       |



**TABLE SIX. SIGNIFICANCE OF NS/BUBBLE OVERLAPS & G-QUADRUPLIX DISTRIBUTIONS**

| <b>A. Distribution of nascent strands (NS) vis-à-vis bubbles</b> |                |                         |         |             |           |         |             |         |
|------------------------------------------------------------------|----------------|-------------------------|---------|-------------|-----------|---------|-------------|---------|
| Cell line                                                        | Total NS sites | NS that overlap bubbles | Percent | Mean random | SD Random | p-value | Fold-change | Z-score |
|                                                                  |                |                         |         |             |           |         |             |         |
| <b>IMR-90 NS</b>                                                 | 256990         | 116378                  | 45.3%   | 96,456      | 320.36    | <1e-4   | 1.21        | 62.19   |
| <b>H9 NS</b>                                                     | 208520         | 96088                   | 46.1%   | 79,671      | 280.87    | <1e-4   | 1.21        | 58.45   |
| <b>iPS NS</b>                                                    | 246866         | 114332                  | 46.3%   | 93,619      | 301.88    | <1e-4   | 1.22        | 68.61   |
| <b>HeLa NS</b>                                                   | 233545         | 107844                  | 46.2%   | 87,645      | 290.69    | <1e-4   | 1.23        | 69.49   |

| <b>B. Distribution of bubble-containing fragments vis-à-vis nascent strands</b> |               |                         |         |             |           |         |             |         |
|---------------------------------------------------------------------------------|---------------|-------------------------|---------|-------------|-----------|---------|-------------|---------|
| Cell line                                                                       | Total bubbles | Bubbles that overlap NS | Percent | Mean random | SD random | p-value | Fold-change | Z-score |
|                                                                                 |               |                         |         |             |           |         |             |         |
| <b>IMR-90</b>                                                                   | 123297        | 45391                   | 36.8%   | 38719       | 120.44    | <1e-4   | 1.17        | 55.40   |
| <b>H9</b>                                                                       | 123297        | 40841                   | 33.1%   | 34822       | 116.25    | <1e-4   | 1.17        | 51.78   |
| <b>iPS</b>                                                                      | 123297        | 45779                   | 37.1%   | 38721       | 116.90    | <1e-4   | 1.18        | 60.38   |
| <b>HeLa</b>                                                                     | 123297        | 45361                   | 36.8%   | 37755       | 115.95    | <1e-4   | 1.20        | 65.60   |

| <b>C. Distribution of G-quadruplexes (G-Qs) vis-à-vis bubble-containing fragments</b> |               |                           |         |             |           |         |             |         |
|---------------------------------------------------------------------------------------|---------------|---------------------------|---------|-------------|-----------|---------|-------------|---------|
|                                                                                       | Total G-Qs    | G-Qs that overlap bubbles | Percent | Mean random | SD random | p-value | Fold-change | Z-score |
|                                                                                       |               |                           |         |             |           |         |             |         |
|                                                                                       | 934355        | 369178                    | 39.5%   | 308738      | 975.10    | <1e-4   | 1.20        | 61.98   |
|                                                                                       |               |                           |         |             |           |         |             |         |
|                                                                                       | Total bubbles | Bubbles that overlap G-Qs | Percent | Mean random | SD random | p-value | Fold-change | Z-score |
|                                                                                       |               |                           |         |             |           |         |             |         |
|                                                                                       | 123297        | 79338                     | 64.3%   | 75485       | 136.40    | <1e-4   | 1.05        | 28.25   |
